# Supplementary material for: Cohort profile: HealthWise Wales. A research register and population health data platform with linkage to National Health Service data sets in Wales
Source: PubMed Central journal article supplement — BMJ Open. 2019 Dec 2;9(12):e031705. doi: 10.1136/bmjopen-2019-031705 (PMC7003385; doi:10.1136/bmjopen-2019-031705), 2019-12-02
Supplement: bmjopen-2019-031705.draft_revisions.pdf [file bmjopen-2019-031705.draft_revisions.pdf]

# BMJ Open

BMJ Open is committed to open peer review. As part of this commitment we make the peer review history of every article we publish publicly available.

When an article is published we post the peer reviewers' comments and the authors' responses online. We also post the versions of the paper that were used during peer review. These are the versions that the peer review comments apply to.

The versions of the paper that follow are the versions that were submitted during the peer review process. They are not the versions of record or the final published versions. They should not be cited or distributed as the published version of this manuscript.

BMJ Open is an open access journal and the full, final, typeset and author-corrected version of record of the manuscript is available on our site with no access controls, subscription charges or pay-per-view fees (<http://bmjopen.bmj.com>).

If you have any questions on BMJ Open's open peer review process please email [info.bmjopen@bmj.com](mailto:info.bmjopen@bmj.com)

# BMJ Open

## Cohort Profile: HealthWise Wales. A research register and population health data platform with linkage to National Health Service datasets in Wales

|                               |                                                                                                                                                                                                                                                                                                                                                                                                                                                                                                                                                                                                                                                                            |
|-------------------------------|----------------------------------------------------------------------------------------------------------------------------------------------------------------------------------------------------------------------------------------------------------------------------------------------------------------------------------------------------------------------------------------------------------------------------------------------------------------------------------------------------------------------------------------------------------------------------------------------------------------------------------------------------------------------------|
| Journal:                      | <i>BMJ Open</i>                                                                                                                                                                                                                                                                                                                                                                                                                                                                                                                                                                                                                                                            |
| Manuscript ID                 | bmjopen-2019-031705                                                                                                                                                                                                                                                                                                                                                                                                                                                                                                                                                                                                                                                        |
| Article Type:                 | Cohort profile                                                                                                                                                                                                                                                                                                                                                                                                                                                                                                                                                                                                                                                             |
| Date Submitted by the Author: | 15-May-2019                                                                                                                                                                                                                                                                                                                                                                                                                                                                                                                                                                                                                                                                |
| Complete List of Authors:     | Hurt, Lisa; Cardiff University School of Medicine, Division of Population Medicine<br>Ashfield-Watt, Pauline; Cardiff University School of Medicine, Division of Population Medicine<br>Townson, Julia; Cardiff University, Centre for Trials Research<br>Heslop, Luke; Cardiff University School of Medicine, Division of Population Medicine<br>Copeland, Lauren; Cardiff University School of Medicine, Division of Population Medicine<br>Atkinson, Mark; Swansea University, Medical School<br>Horton, Jeffrey; Cardiff University, Patient and Public Representative<br>Paranjothy, Shantini; Cardiff University School of Medicine, Division of Population Medicine |
| Keywords:                     | Research database, Data linkage, Adults, Life-course epidemiology, Public and patient involvement                                                                                                                                                                                                                                                                                                                                                                                                                                                                                                                                                                          |
|                               |                                                                                                                                                                                                                                                                                                                                                                                                                                                                                                                                                                                                                                                                            |

SCHOLARONE™  
Manuscripts

1  
2  
3 **Cohort Profile: HealthWise Wales. A research register and population health data platform**  
4  
5 **with linkage to National Health Service datasets in Wales**  
6  
7  
8  
9

10 **Author list**  
11

12 Lisa Hurt<sup>1</sup>, Pauline Ashfield-Watt<sup>1</sup>, Julia Townson<sup>2</sup>, Luke Heslop<sup>1</sup>, Lauren Copeland<sup>1</sup>, Mark  
13  
14  
15 Atkinson<sup>3</sup>, Jeffrey Horton<sup>4</sup>, Shantini Paranjothy<sup>1\*</sup>  
16  
17

- 18  
19  
20 1 Division of Population Medicine, Cardiff University School of Medicine, Cardiff, UK  
21  
22 2 Centre for Trials Research, College of Biomedical and Life Sciences, Cardiff University,  
23  
24 UK  
25  
26 3 Swansea University Medical School, Swansea, UK  
27  
28 4 Patient and Public Representative  
29  
30  
31  
32  
33  
34

35 Word count: 3065  
36  
37  
38  
39

40 \* Corresponding author: Professor Shantini Paranjothy, [paranjothys@cardiff.ac.uk](mailto:paranjothys@cardiff.ac.uk)  
41  
42  
43  
44

45 **Keywords:** Research database, data linkage, adults, life-course epidemiology, public  
46  
47 involvement  
48  
49  
50  
51  
52  
53  
54  
55  
56  
57  
58  
59  
60

## Abstract

**Purpose:** Recruitment and follow-up in epidemiological studies is challenging, time-consuming and expensive. Combining online data collection with a register of individuals who agree to be contacted with information on research opportunities provides an efficient, cost-effective platform for population-based research. HealthWise Wales (HWW) aims to facilitate population health research by recruiting a cohort of “research-ready” individuals, advertising relevant studies to these participants, supporting data collection on specific topics, and providing access to cohort and linked healthcare data for secondary analyses.

**Participants:** Adults (aged 16 and above) living or receiving their healthcare in Wales are eligible for inclusion. Participants consent to be contacted for follow-up data collection and for their details to be used to access their routinely-collected NHS records for research purposes. Data are collected using a web-based application, with new questionnaires added every six months. Data collection on socio-demographic and lifestyle factors is repeated at two-to-three year intervals. Recruitment is ongoing, with 21,779 active participants (alive and currently registered).

**Findings to date:** 99% of participants have complete information on age and sex, and 64% have completed questionnaires on socio-demographic and lifestyle factors. These data can be linked with national health databases within the Secure Anonymised Information Linkage (SAIL) databank, with 93% of participants matching a record in SAIL. HWW has facilitated the recruitment of 43,826 participants to 15 different studies.

**Future plans:** The medium-term goal for the project is to enrol at least 50,000 adults. Recruitment strategies are being devised to achieve a study sample that closely models the population of Wales, with sufficient numbers in socio-demographic subgroups to allow for

1  
2  
3 the selection of populations for research from those groups. Potential bio-sampling methods  
4  
5 are also currently being explored.  
6  
7  
8  
9  
10  
11  
12  
13  
14  
15  
16  
17  
18  
19  
20  
21  
22  
23  
24  
25  
26  
27  
28  
29  
30  
31  
32  
33  
34  
35  
36  
37  
38  
39  
40  
41  
42  
43  
44  
45  
46  
47  
48  
49  
50  
51  
52  
53  
54  
55  
56  
57  
58  
59  
60

For peer review only

### Strengths and limitations

- More than 20,000 individuals with a diverse socio-demographic profile have registered, and recruitment is ongoing.
- Matching rates of participant data with routinely-collected healthcare records are very high.
- Participants are “research ready”, with HWW facilitating the recruitment of 43,826 participants to 15 different studies to date.
- Men, individuals below 25 and over the age of 65, and participants from the most deprived wealth quintiles are currently under-represented. Recruitment strategies to increase the number of participants in these groups are currently being devised.
- Currently, bio-samples are not collected from participants, although options for this are currently being explored.

## Introduction

High-income countries continue to face major public health challenges, including persistent inequalities in health and wellbeing and the complex needs of ageing populations (1, 2). Meeting these challenges requires a strong research infrastructure to ensure that high quality evidence is generated, for example, on preventing the onset and progression of non-communicable diseases and providing effective and efficient health and care services (3). Large-scale longitudinal studies are an essential resource for studying health and wellbeing throughout the life course. It is estimated that around 3.5% of the UK population are current or recent contributors to cohort studies (4). Using web-based technologies potentially makes recruitment and retention of subjects in such long-term studies less time-consuming and expensive (5). Combining online data collection with a register of individuals who have volunteered to be contacted with opportunities to take part in research also confers additional efficiency (such as SHARE Scotland (6)), and can create a platform to increase public involvement and engagement with research. Increasing awareness of the purpose of research and opportunities for participation should result in increased recruitment to research studies, better quality research to inform policy and practice, and ultimately improved population health outcomes (7).

Wales has a population of over three million people, within clearly defined geographical boundaries and with relatively low levels of migration in or out (8). It faces major challenges from a post-industrial legacy of socio-economic deprivation and a high prevalence of unhealthy behaviours (3, 9). High-quality, population-based research in this setting has already provided important evidence for policy and practice in the United Kingdom and

1  
2  
3 beyond (10). HealthWise Wales (HWW) aims to provide an integrated cost-effective platform  
4  
5 for conducting population-based research, by:  
6  
7  
8  
9

- 10 1. Establishing a cohort of “research-ready” individuals consented for re-contact;
- 11
- 12 2. Collecting longitudinal data from participants on self-reported exposures and outcomes;
- 13
- 14
- 15 and
- 16
- 17
- 18 3. Using routinely-available healthcare data through record linkage (11, 12).
- 19
- 20
- 21
- 22

23 Overall, HWW plans to contribute to shape the health and wellbeing of future generations in  
24  
25 Wales, and help the National Health Service (NHS) in Wales plan for the future.  
26  
27  
28  
29

### 30 **Cohort Description**

#### 31 *Setting*

32  
33 Recruitment into HWW is ongoing and dynamic, with individuals joining (or leaving) on a  
34  
35 continuous basis and with varying levels of participation during their life course. Recruitment  
36  
37 started during a pilot phase (March 2015 to February 2016), followed by a public launch on  
38  
39 February 29<sup>th</sup> 2016. Recruitment protocols have been designed to ensure representation  
40  
41 across all areas of Wales. Overall, the distribution of HWW participants by residence is  
42  
43 representative of Wales. For example, census data show that 67% of the Welsh population  
44  
45 live in urban areas (defined as settlements of at least 10,000 people) (13), compared with 63%  
46  
47 in HWW.  
48  
49  
50  
51  
52  
53  
54  
55  
56  
57  
58  
59  
60



### *Eligibility criteria and participant recruitment*

Adults (aged 16 or above) who are usually resident or receive their healthcare in Wales are eligible to join, and are invited to be:

1. Followed up at regular intervals to obtain information about their health, wellbeing and specific exposures (such as behavioural risk factors), and allow record-linkage with their routinely-collected health records;
2. Entered onto a database of potential participants for research studies;
3. Contacted to take part in specific research studies;
4. Actively engaged and involved in dialogue to shape the priorities of the research programme.

Television, radio and social media advertising campaigns have been undertaken to issue an open invitation to potential participants to register. The project has been promoted at a wide range of events across Wales (for example, cultural events such as the Eisteddfod and agricultural shows such as the Royal Welsh and Anglesey shows) and in different settings (such as NHS hospitals, general practices, pharmacy outlets, and large employers). Mass postal mail-outs have also been piloted in one Health Board area, and there are plans to extend this method of communication about the project to other areas of Wales.

There are three core recruitment methods that are adapted for use as appropriate in different settings. Participants can give their consent to join the project through an online web application, which is accessed via the project's website ([www.healthwisewales.gov.wales](http://www.healthwisewales.gov.wales), see Figure 1). They can also be recruited face-to-face using tablets or paper-based sign-up forms

1  
2  
3 at events and various locations across Wales, or can give their consent to be contacted by  
4  
5 individuals from the Participant Resource Centre at Cardiff University who can provide them  
6  
7 with further information about HWW by email or telephone. Protocols describing the use of  
8  
9 these recruitment methods and relevant study materials in various settings have been  
10  
11 developed and have been implemented by HWW champions (members of the public who  
12  
13 have volunteered to engage and involve other members of the public) and  
14  
15 facilitators/research assistants (Health and Care Research Wales and NHS support and  
16  
17 delivery staff). A range of recruitment and data collection strategies have also been developed  
18  
19 for individuals who do not have internet access and/or may not have been exposed to the  
20  
21 advertising campaigns. These have included study recruiters using mobile technologies with  
22  
23 an internet connection to collect data at community-based locations, or telephone-based  
24  
25 consent and data collection.  
26  
27  
28  
29  
30  
31  
32  
33  
34

35 The medium term goal is to enrol at least 50,000 adults. This proposed sample size will be  
36  
37 significantly larger than current population-based surveys in Wales, providing more precise  
38  
39 estimates of the prevalence of exposures and outcomes in different socio-demographic  
40  
41 groups, and adequate power to answer a range of different research questions about the  
42  
43 determinants of health and wellbeing.  
44  
45  
46  
47  
48

#### 49 *Research themes*

50  
51 The project has five research themes:

- 52  
53 1. Impact of social inequalities on health and wellbeing;
- 54  
55 2. Environment, neighbourhood and health;
- 56  
57  
58  
59  
60

- 1
- 2
- 3 3. Maintenance of health and wellbeing in the working age population;
- 4
- 5
- 6 4. Wellbeing in later life; and
- 7
- 8 5. Innovation in health and social care services.
- 9

10  
11  
12  
13 These themes are broad to guide data collection and facilitate use of the HWW platform by a  
14  
15 wide range of health and social care researchers. Across these themes, there is a focus on  
16  
17 four health areas (cancer, mental health, dementia and family life, pregnancy and early  
18  
19 childhood health and development).  
20  
21  
22

#### 23 24 25 *Methods of data collection and follow-up*

26  
27 Data are collected using a web-based application, designed specifically for the project, which  
28  
29 is accessible to participants through the main HWW website. New questionnaires are added  
30  
31 every six months. These either collect information on items relevant to the research themes  
32  
33 outlined above, or bespoke data to facilitate researcher-led projects that are aligned to the  
34  
35 research themes. Descriptive information on the core research questionnaires, their  
36  
37 availability to participants since the project launched in 2015, and completion numbers are  
38  
39 presented in Table 1. These collect data on socio-demographic factors, lifestyle factors, home  
40  
41 life, and mental health at baseline and will be repeated at two-to-three year intervals as  
42  
43 appropriate. There is also an additional set of modified core questionnaires that collect  
44  
45 information from pregnant women on their health and care.  
46  
47  
48  
49  
50  
51

52  
53  
54 Outcome data are obtained in two ways. First, data are collected on the HWW platform for  
55  
56 patient-reported outcome measures and those relevant to conditions likely to be under-  
57  
58 represented in routinely-collected data (for example, infections, metabolic diseases,  
59  
60

1  
2  
3 psychiatric conditions and wellbeing). Second, outcome information can be obtained through  
4  
5 record linkage with national health databases (such as the Patient Episode Database for Wales  
6  
7 and general practice data) within the Secure Anonymised Information Linkage (SAIL) databank  
8  
9 (11, 12). Future phases of the project will also include linkage with other administrative  
10  
11 datasets.  
12  
13  
14  
15  
16  
17

18 The NHS Wales Informatics Service (NWIS, a trusted third party) uses the personal details of  
19  
20 participants (with their consent) to generate an anonymised linking field (ALF\_E) based on  
21  
22 their name, address, gender and date of birth. This is used to link participants' data with  
23  
24 routinely-collected healthcare data sets, with 93% of active participants matching with a  
25  
26 record in SAIL. The SAIL databank and the Secure Access Portal and Protected HWW  
27  
28 Information Repository (SAPPHIRE) are stored in separate areas of the UK Secure e-Research  
29  
30 Platform (UKSeRP, (14)). Figure 2 shows the flow of project data, showing SAPPHIRE within  
31  
32 UKSeRP where project-specific, anonymised HWW data can be accessed.  
33  
34  
35  
36  
37  
38  
39

#### 40 *Characteristics of participants*

41  
42 There are currently more than 20,000 active participants (alive and currently registered).  
43  
44 Ninety-nine percent of registered participants have complete information on age and sex, and  
45  
46 at least 64% have completed the other core questionnaires. Table 2 shows the characteristics  
47  
48 of active participants compared with data from published sources of Welsh data. Compared  
49  
50 with the population of Wales, there is a higher percentage of participants who are 45 to 64  
51  
52 years old. The percentage of women is higher than in the general population (72% compared  
53  
54 with 51%). The percentage of participants in non-white ethnic groups is the same as in the  
55  
56 general population. Fifty percent of participants are classified as being in higher managerial  
57  
58  
59  
60

1  
2  
3 or professional occupations, compared with 27% of the population of Wales. In terms of  
4  
5 health-related behaviours: 56% are classified as active or moderately active; 10% are current  
6  
7 smokers (compared with 19% of the general population); and 50% drink more alcohol than  
8  
9 recommended by UK guidance (compared with 40% of the general population). Twenty-eight  
10  
11 percent of participants have a Mental Health Inventory score consistent with a common  
12  
13 mental disorder and 32% have been diagnosed with or treated for a mental health condition  
14  
15 (compared with 13% of the general population). Figure 3 shows the distribution of  
16  
17 participants according to the Welsh Index of Multiple Deprivation compared with the  
18  
19 population of Wales. There is a good representation of participants in each deprivation  
20  
21 quintile, although a higher percentage of participants are from the least deprived quintile.  
22  
23  
24  
25  
26  
27  
28  
29

### 30 *Patient and public involvement*

31  
32 HWW has a specific focus on increasing public involvement and engagement in health and  
33  
34 social care research. To ensure these aims are achieved, the project is overseen by a Public  
35  
36 Involvement Delivery Board (PIDB), which is chaired by an independent member of the public  
37  
38 and whose membership is predominantly comprised of members of the public. The PIDB  
39  
40 provides scrutiny and assurance that the project is operating in the public interest, and  
41  
42 provides advice and support in delivering best practice in accordance with the National  
43  
44 Standards for Public Involvement (<https://www.invo.org.uk/posttypepublication/national-standards-for-public-involvement/>). The Board and the research team co-produced the  
45  
46 project's Patient and Public Involvement (PPI) policy and implementation plan. The research  
47  
48 team has a dedicated PPI lead who is responsible for maintaining the policy document and  
49  
50 ensuring compliance with it. All research team members are trained on facilitating public  
51  
52 involvement. There are two PPI members of the research team, who have agreed objectives  
53  
54  
55  
56  
57  
58  
59  
60

1  
2  
3 for their role and attend monthly meetings where they are actively involved in discussions  
4  
5 and decision-making relating to research team activities. We have also trained 78 local health  
6  
7 board members as facilitators to engage the public and recruit participants to HWW.  
8  
9

10  
11  
12 Involvement opportunities (including participation in media promotions or development and  
13  
14 user-testing of data collection questionnaires) are regularly offered to participants through a  
15  
16 quarterly e-newsletter. As a result, three participants became the faces of the advertising  
17  
18 campaign in March 2017, others have participated in social media promotions, and 156  
19  
20 agreed to be members of a user-testing panel.  
21  
22  
23

24  
25  
26  
27 PPI is an essential criterion for all studies that use HWW, and researchers are required to  
28  
29 describe the PPI they have undertaken when applying to use the data or the platform. PPI  
30  
31 research team members scrutinise this element of applications as part of their overall  
32  
33 assessment of all new projects.  
34  
35  
36

### 37 38 39 *Ethical approval and governance arrangements*

40  
41  
42 The project is overseen by an Executive Group, which provides oversight and decision making  
43  
44 on the overall delivery of initiative, and receives advice from a Scientific Steering Group (SSG)  
45  
46 and the Public Involvement Delivery Board. The role of the PIDB has been described above.  
47  
48  
49

50  
51  
52 HWW received ethical approval from Wales Research Ethics Committee (REC) 3 on 16th  
53  
54 March 2015 (reference 15/WA/0076). Substantial amendments are submitted when new  
55  
56 questionnaires are added or if there is a substantial change to the content of participant-  
57  
58 facing materials or recruitment model, in line with current guidance from the committee. The  
59  
60

1  
2  
3 data collection system and study processes are designed to safeguard the integrity and  
4 confidentiality of data collected and generated for HWW research, and appropriate systems  
5  
6 have been established and tested to report any failures in these respects. Standard Operating  
7  
8 Procedures (SOPs) are in place to ensure that HWW is conducted within research governance  
9  
10 regulations and compliant with the General Data Protection Regulation (GDPR) (EU)  
11  
12 2016/679. The research team meet with the HWW Data Guardian every six months to review  
13  
14 the data governance processes in place and any matters arising.  
15  
16  
17  
18  
19  
20  
21  
22

### 23 *Funding*

24  
25 HWW is funded by Health and Care Research Wales.  
26  
27  
28  
29

### 30 **Research activities**

31  
32 HealthWise Wales supports researchers in three ways by: advertising relevant studies to  
33 participants; providing access to cohort data for secondary analyses via the researcher portal;  
34  
35 and supporting data collection on specific topics within the platform that can then be linked  
36  
37 with healthcare data. To date, seven studies have used the database to inform potential  
38  
39 participants of an opportunity to take part in their research (see Table 3), with recruitment  
40  
41 for each of these exceeding the required target. Nine studies have used the platform to  
42  
43 collect data on study-specific questionnaires (see Table 4), with more than 5,000 participants  
44  
45 providing data for each of these. In total, HWW has facilitated the recruitment of 43,826  
46  
47 participants to 15 different studies to date.  
48  
49  
50  
51  
52  
53  
54  
55  
56  
57  
58  
59  
60

### Strengths and limitations

There are several strengths of HWW as a resource for research. More than 20,000 individuals with a diverse socio-demographic profile have already registered, and recruitment is ongoing. Matching rates of participant data with routinely-collected healthcare records are very high. In contrast with other population-based cohorts in the UK (4), HWW participants are younger, with most between 30 and 60 years old. This provides an opportunity to conduct longitudinal population studies with data collected pre-disease onset. Participants are also “research ready”; the examples given above demonstrate that the platform provides an effective way for the research community to reach an engaged, responsive cohort. A targeted retention plan is being developed with PPI representatives and a wider stakeholder group to encourage continued active participation in the project. Strategies found by other studies to be effective will be adapted to suit the HWW cohort, including the provision of real-time feedback to participants when they provide data, the development of an online community where participants can share their research experiences, and regular, diverse public engagement events to disseminate emerging results.

Men are currently under-represented in the cohort; only 28% of registered participants are male. Similarly, there are fewer individuals below 25 and over the age of 65 than in the general population, and a smaller percentage of participants from routine and manual occupations and in the most deprived wealth quintiles. Recruitment strategies to increase the number of participants in these groups are currently being devised. The aim is to achieve a study sample that closely models the population of Wales, with sufficient numbers in socio-demographic subgroups to allow for the selection of populations for research from those



1  
2  
3 groups. For example, the cohort currently includes 5,000 men, providing a substantial sample  
4  
5 size that will be adequate for some analyses.  
6  
7  
8  
9

10 Currently, bio-samples are not collected from participants. Formative research examining the  
11  
12 willingness of individuals to provide different types of biological samples for research as part  
13  
14 of their participation in HWW showed that 83% would be willing to do so. Options for a  
15  
16 strategic approach to bio-sampling across Wales, and therefore a future enhancement that  
17  
18 will increase the value of this cohort, are currently being explored.  
19  
20  
21  
22  
23  
24

### 25 **Collaboration**

26  
27 Figure 4 shows the application process for all research activities that can be undertaken using  
28  
29 the HWW platform. All documentation informing researchers of how to apply to use the  
30  
31 HWW platform was made public in June 2018, and access to the data has been possible since  
32  
33 September 2018. A guide for researchers giving full details of the application and review  
34  
35 process, and a copy of the application form, are available on the study website  
36  
37 ([www.healthwisewales.gov.wales/for-researchers](http://www.healthwisewales.gov.wales/for-researchers)).  
38  
39  
40  
41  
42  
43

44 Requests to advertise projects to HWW participants via newsletters or social media are  
45  
46 reviewed on a case-by-case basis by the HWW research team. The HWW ethical approval and  
47  
48 participant consent permit HWW to advertise research projects to registered participants as  
49  
50 long as they fit with the ethos and scope of the initiative. It is the responsibility of applicants  
51  
52 to obtain ethical approval for the conduct of their specific study before HWW advertises it to  
53  
54 participants. This ethical approval should specify that HWW will be used to help recruit  
55  
56 participants.  
57  
58  
59  
60

1  
2  
3  
4  
5  
6 Applications to use HWW for data collection or analysis are reviewed by the SSG and by PPI  
7  
8 representatives, to assess that the project fits with the ethos of HWW, is scientifically sound,  
9  
10 and that adequate PPI input has been sought in the development of the proposal. Once  
11  
12 approved, researchers work closely with the HWW research team to deliver the project,  
13  
14 including working together to prepare the application for a substantial amendment to the  
15  
16 HWW ethical approval (which is needed for all new data collection). Researchers will need to  
17  
18 provide evidence that they are bona fide researchers and have appropriate training in  
19  
20 Research Data and Confidentiality procedures in order to gain access to the HWW data  
21  
22 repository via SAPPHiRe.  
23  
24  
25  
26  
27  
28  
29

30 Any publications related to the use of HWW resource must be sent to the research team, and  
31  
32 a lay summary of the study findings must be shared with the team for publication on the  
33  
34 website. All researchers using HWW should use the following standard text for  
35  
36 acknowledgement in any publication arising from the use of the platform:  
37  
38  
39  
40  
41

42 *“This study was facilitated by HealthWise Wales, the Health and Care Research Wales*  
43  
44 *initiative, which is led by Cardiff University in collaboration with SAIL, Swansea University.”*  
45  
46  
47  
48

49 Additional references are required for publications which use the SAIL databank and UKSeRP.  
50  
51 These can be found in the Researcher Guidance document on the researcher tab of the HWW  
52  
53 website: [www.healthwisewales.gov.wales/for-researchers/](http://www.healthwisewales.gov.wales/for-researchers/)  
54  
55  
56  
57  
58  
59  
60

### Further details

Researchers should contact the research team (on [healthwisewales@cardiff.ac.uk](mailto:healthwisewales@cardiff.ac.uk) or 0800 9172 172) before submitting their application to obtain guidance on how best to use the platform in their study, patient and public involvement processes, ethical requirements, questionnaire development, implementation and promotion.

### Conclusion

HWW is a research database of adults (aged 16 and above) living or receiving their healthcare in Wales that can support researchers by: advertising relevant studies to registered participants; providing access to cohort data for secondary analyses via the researcher portal; and supporting data collection on specific topics with record-linkage to healthcare data if required. It has been successful in recruiting a “research ready” cohort in Wales, and to date has facilitated recruitment of 43,826 participants into 15 studies.

## Acknowledgements

We gratefully acknowledge the contribution of Charlotte Bonner-Evans and Ameeta Richardson in the coordination, management and implementation of the platform. We would also like to thank Sean Dunn, Benjamin Dowie, Alex Coomber and others within the Participant Resource Centre (Cardiff University) and the Health and Care Research Wales Support and Delivery Centre for their contribution to recruitment and data collection, and the Welsh Government Communication team for their contribution to the Communications Plan. We acknowledge the substantial contribution of the Scientific Steering Group, the HealthWise Wales Executive group, the Public Involvement Delivery Board, Chris Stock, the Centre for Trials Research and Professor Mike Robling (Data Guardian). We also thank the participants.

## References

1. Marmot M. *The health gap. The challenge of an unequal world*. London: Bloomsbury Publishing; 2015.
2. Prince M, Wu F, Guo Y, Robledo L, O'Donnell M, Sullivan R, et al. The burden of disease in older people and implications for health policy and practice. *Lancet* 2015; 385(9967): 549-62.
3. Chief Medical Officer. *Chief Medical Officer for Wales Annual Report 2015-16. Rebalancing healthcare. Working in partnership to reduce social inequity*. Cardiff: Welsh Government, 2016.
4. Medical Research Council. *Maximising the value of UK population cohorts. MRC Strategic Review of the Largest UK Population Cohort Studies*. London: Medical Research Council, 2014.
5. Manolio T, Weis B, Cowie C, Hoover R, Hudson K, Kramer B, et al. New models for large prospective studies: is there a better way? *American Journal of Epidemiology* 2012; 175(9): 859-66.
6. McKinstry B, Sullivan F, Vasishta S, Armstrong R, Hanley J, Haughney J, et al. Cohort profile: the Scottish Research register SHARE. A register of people interested in research participation linked to NHS data sets. *BMJ Open*. 2017; 7(2): e013351.
7. Staley K. 'Is it worth doing?' Measuring the impact of patient and public involvement in research. *Research Involvement and Engagement* 2015; 1(1): 6.
8. Office for National Statistics. *Statistical Bulletin. Population estimates for the UK, England and Wales, Scotland and Northern Ireland: mid-2017*. London: Office for National Statistics, 2018.

- 1  
2  
3 9. Chief Medical Officer. *Chief Medical Officer for Wales Annual Report 2014-15.*  
4  
5 *Healthier, Happier, Fairer.* Cardiff: Wesh Government, 2015.  
6  
7  
8 10. Elwood P, Galante J, Pickering J, Palmer S, Bayer A, Ben-Shlomo Y, et al. Healthy  
9 lifestyles reduce the incidence of chronic diseases and dementia: evidence from the Caerphilly  
10 cohort study. *PLoS One* 2013; 8(12): e81877.  
11  
12  
13 11. Ford D, Jones K, Verplancke J, Lyons R, John G, Brown G, et al. The SAIL Databank:  
14 building a national architecture for e-health research and evaluation. *BMC Health Services*  
15 *Research* 2009; 9(1): 157.  
16  
17  
18 12. Lyons R, Jones K, John G, Brooks C, Verplancke J, Ford D, et al. The SAIL databank:  
19 linking multiple health and social care datasets. *BMC Medical Informatics and Decision*  
20 *Making* 2009; 9(1): 3.  
21  
22  
23 13. Office for National Statistics. *2011 Census Analysis - Comparing Rural and Urban Areas*  
24 *of England and Wales.* London: Office for National Statistics, 2013.  
25  
26  
27 14. Jones K, Ford D, Jones C, Dsilva R, Thompson S, Brooks C, et al. A case study of the  
28 Secure Anonymous Information Linkage (SAIL) Gateway: a privacy-protecting remote access  
29 system for health-related research and evaluation. *Journal of Biomedical Informatics* 2014;  
30 50: 196-204.  
31  
32  
33  
34  
35  
36  
37  
38  
39  
40  
41  
42  
43  
44  
45  
46  
47  
48  
49  
50  
51  
52  
53  
54  
55  
56  
57  
58  
59  
60

1  
2  
3  
4  
5  
6  
7  
8  
9  
10  
11  
12  
13  
14  
15  
16  
17  
18  
19  
20  
21  
22  
23  
24  
25  
26  
27  
28  
29  
30  
31  
32  
33  
34  
35  
36  
37  
38  
39  
40  
41  
42  
43  
44  
45  
46  
47  
48  
49  
50  
51  
52  
53  
54  
55  
56  
57  
58  
59  
60

**Tables and Figures**

For peer review only

**Table 1: Outline of data collection questionnaires, timelines and summary of completions**

| Core module themes*                  | Brief overview of module content                                                                                                                                    | Data collection period |        |        |        |        |        | Status in Sept-18 |
|--------------------------------------|---------------------------------------------------------------------------------------------------------------------------------------------------------------------|------------------------|--------|--------|--------|--------|--------|-------------------|
|                                      |                                                                                                                                                                     | Apr-15                 | Apr-16 | Oct-16 | Apr-17 | Oct-17 | Apr-18 |                   |
| <b>Registration</b>                  | - Consent, personal details including date of birth, gender and postcode (for the assignment of Welsh Index of Multiple Deprivation)                                |                        |        |        |        |        |        | <b>21779</b>      |
| <b>Socio-demographic information</b> | - Ethnic group                                                                                                                                                      |                        |        |        |        |        |        | <b>14433</b>      |
|                                      | - Occupation and social class (National Statistical Socio-economic Classification, NS-SeC)<br>- Family life: relationship status, children, caring responsibilities |                        |        |        |        |        |        | <b>11004</b>      |
| <b>Behavioural risk factors</b>      | - Physical activity (General Practice Physical Activity questionnaire, GPPAQ)                                                                                       |                        |        |        |        |        |        | <b>14633</b>      |
|                                      | - Smoking (current smoking, second-hand smoke exposure, e-cigarette use)                                                                                            |                        |        |        |        |        |        |                   |
|                                      | - Alcohol (frequency in past 12 months, binge drinking in past 7 days)                                                                                              |                        |        |        |        |        |        |                   |
|                                      | - Anthropometry (self-report of weight and height)                                                                                                                  |                        |        |        |        |        |        |                   |
| <b>Mental health</b>                 | - Diet (self-report on whether diet is healthy, fruit, veg and sweetened beverage intake yesterday)                                                                 |                        |        |        |        |        |        | <b>14206</b>      |
|                                      | - Mood over the past month, measured using the five-item Mental Health Inventory (MHI-5)                                                                            |                        |        |        |        |        |        | <b>14581</b>      |
|                                      | - Resilience Research Centre Adult Resilience Measure (RRC-ARM 28)                                                                                                  |                        |        |        |        |        |        | <b>3125</b>       |
|                                      | - Buckner Neighbourhood Cohesion Scale                                                                                                                              |                        |        |        |        |        |        | <b>3206</b>       |
|                                      | - Warwick-Edinburgh Mental Wellbeing Scale                                                                                                                          |                        |        |        |        |        |        | <b>Oct 18</b>     |

\* Pregnant women complete modified versions of the core modules

**Key to modules:**

|  |              |
|--|--------------|
|  | Live modules |
|--|--------------|



**Table 2: Characteristics of the HealthWise Wales cohort and population data from published sources for Wales**

| Characteristic                                                     | HealthWise Wales | Population data for Wales from published sources |
|--------------------------------------------------------------------|------------------|--------------------------------------------------|
| <b>Total who have completed registration form</b>                  | <b>21,779</b>    |                                                  |
| <b>Age group:</b>                                                  |                  |                                                  |
| 16-24 years                                                        | 10%              | 14% <sup>1</sup>                                 |
| 25-44 years                                                        | 30%              | 29%                                              |
| 45-64 years                                                        | 38%              | 32%                                              |
| 65+ years                                                          | 22%              | 25%                                              |
| Completed by (% of those registered)                               | N=21,746 (99%)   |                                                  |
| <b>Sex:</b>                                                        |                  |                                                  |
| Male                                                               | 28%              | 49% <sup>2</sup>                                 |
| Female                                                             | 72%              | 51%                                              |
| Completed by (% of those registered)                               | N=21,737 (99%)   |                                                  |
| <b>Ethnic group:</b>                                               |                  |                                                  |
| White                                                              | 98%              | 98% <sup>3</sup>                                 |
| Other                                                              | 2%               | 2%                                               |
| Completed by (% of those registered)                               | N=14,912 (69%)   |                                                  |
| <b>Standard occupational classification<sup>4</sup>:</b>           |                  |                                                  |
| 1 (Higher managerial, administrative and professional occupations) | 50%              | 27% <sup>5</sup>                                 |
| 2 (Intermediate occupations)                                       | 18%              | 21%                                              |
| 3 (Routine and manual occupations)                                 | 11%              | 37%                                              |
| Other (Never-worked, long-term unemployed and full-time students)  | 21%              | 15%                                              |
| Completed by (% of those completing questionnaire)                 | N=13,268 (97%)   |                                                  |
| <b>Physical activity (GPPAQ):</b>                                  |                  |                                                  |
| Active                                                             | 35%              | No comparable data found                         |
| Moderately active                                                  | 21%              |                                                  |
| Moderately inactive                                                | 15%              |                                                  |
| Inactive                                                           | 29%              |                                                  |
| Completed by (% of those completing questionnaire)                 | N=13,647 (98%)   |                                                  |
| <b>Smoking:</b>                                                    |                  |                                                  |
| Current smoker                                                     | 10%              | 19% <sup>6</sup>                                 |
| Ex-smoker                                                          | 35%              | 29%                                              |
| Never smoked                                                       | 55%              | 52%                                              |
| Completed by (% of those completing questionnaire)                 | N=13,881 (99%)   |                                                  |
| <b>Binge drinking in past week:</b>                                | 23%              | 24% <sup>7</sup>                                 |
| Completed by (% of those completing questionnaire)                 | N=12,229 (88%)   |                                                  |
| <b>Drinking alcohol above guideline levels:</b>                    | 50%              | 40% <sup>7</sup>                                 |
| Completed by (% of those completing questionnaire)                 | N=12,229 (88%)   |                                                  |
| <b>Mental Health Inventory (MHI-5) score:</b>                      |                  |                                                  |
| Score consistent with common mental disorder <sup>8</sup>          | 28%              |                                                  |
| Completed by (% of those completing questionnaire)                 | N=13,694 (99%)   |                                                  |
| <b>Diagnosed with or treated for a mental health condition?</b>    | 32%              | 13% <sup>9</sup>                                 |
| Completed by (% of those completing questionnaire)                 | N=13,837 (99%)   |                                                  |

- 1  
2  
3 <sup>1</sup>Mid-year population estimates for Wales 2017, Office for National Statistics (from StatsWales, <https://statswales.gov.wales/>)  
4 <sup>2</sup>Mid-year population estimates for individuals aged 16+ in Wales 2017, Office for National Statistics (from StatsWales)  
5 <sup>3</sup>Population estimates for individuals aged 16+ in Wales 2011, Office for National Statistics (from StatsWales)  
6 <sup>4</sup>Using the National Statistics Socio-Economic Classification (NS-SEC, Office for National Statistics)  
7 <sup>5</sup>Population estimates for individuals aged 16-74 in Wales, 2011 UK Census  
8 <sup>6</sup>Estimates for individuals 16+yrs from the National Survey for Wales 2017-18 ([https://gov.wales/statistics-and-research/national-survey/?tab=el\\_home&topic=population\\_health&lang=en](https://gov.wales/statistics-and-research/national-survey/?tab=el_home&topic=population_health&lang=en))  
9 <sup>7</sup>Data for individuals aged 16+ from the Welsh Health Survey 2015  
10 <sup>8</sup>Kelly MJ, Dunstan FD, Lloyd K and Fone D. (2008) Evaluating cut-points for the MHI-5 and MCS using the GHQ-12: a comparison of five  
11 different methods. BMC Psychiatry 2008, 8:10  
12 <sup>9</sup>Data for individuals aged 16+ from the Welsh Health Survey 2015; asked whether they were currently being treated for “*depression,*  
13 *anxiety or another mental health illness*”  
14  
15  
16  
17  
18  
19  
20  
21  
22  
23  
24  
25  
26  
27  
28  
29  
30  
31  
32  
33  
34  
35  
36  
37  
38  
39  
40  
41  
42  
43  
44  
45  
46  
47  
48  
49  
50  
51  
52  
53  
54  
55  
56  
57  
58  
59  
60

For peer review only

**Table 3: Engagement of HWW participants with research advertised via the HWW platform**

| Researcher                                                                                                                                                                                                                                                                                           | Study aim                                                                                                                                                                                                                                                                               | Number of responses              |
|------------------------------------------------------------------------------------------------------------------------------------------------------------------------------------------------------------------------------------------------------------------------------------------------------|-----------------------------------------------------------------------------------------------------------------------------------------------------------------------------------------------------------------------------------------------------------------------------------------|----------------------------------|
| <b>Dr Tapio Paljarvi et al</b><br>National Centre for Population Health and Wellbeing Research (NCPHWR)                                                                                                                                                                                              | To validate data on physical activity collected using mobile devices                                                                                                                                                                                                                    | 60                               |
| <b>Professor Ian Jones</b><br>National Centre for Mental Health (NCMH)                                                                                                                                                                                                                               | To recruit participants to the NCMH cohort for mental health research                                                                                                                                                                                                                   | 1,100 (phase 1)<br>600 (phase 2) |
| <b>Dr Anwen Cope<sup>1,2</sup>; Dr Fiona Wood<sup>3</sup>; Dr Nick Francis<sup>3</sup>; Professor Ivor Chestnutt<sup>2</sup></b><br><sup>1</sup> Cardiff and Vale University Health Board; <sup>2</sup> School of Dentistry, Cardiff University; <sup>3</sup> School of Medicine, Cardiff University | To describe the barriers patients experience when trying to access dental care, and to explore factors that influence patients' choice of healthcare provider when experiencing a dental problem                                                                                        | 80                               |
| <b>Dr Dikaïos Sakellariou</b><br>School of Healthcare Sciences, Cardiff University                                                                                                                                                                                                                   | To improve care for disabled people                                                                                                                                                                                                                                                     | 8                                |
| <b>Professor Annmarie Nelson</b><br>Marie Curie Palliative Care Research Centre                                                                                                                                                                                                                      | A survey to understand attitudes to death and dying in Wales                                                                                                                                                                                                                            | 2004                             |
| <b>Victoria Shepherd</b><br>NIHR Doctoral Fellow, Cardiff University                                                                                                                                                                                                                                 | To understand decision making involving adults lacking capacity                                                                                                                                                                                                                         | 2                                |
| <b>Professor Petroc Sumner</b><br>School of Psychology, Cardiff University                                                                                                                                                                                                                           | To examine the prevalence of dizziness and vertigo in the general population and the potential relationship with other conditions (e.g. migraine)                                                                                                                                       | 2400                             |
| <b>Dr Patricia Masterson Algar</b><br>School of Health Sciences, Bangor University                                                                                                                                                                                                                   | To examine the experience of young adults who live in families affected by stroke, multiple sclerosis or dementia and investigate their support networks and their engagement in peer support                                                                                           | 2                                |
| <b>Dr Kathryn Peall</b><br>Division of Psychological Medicine and Clinical Neurosciences, Cardiff University                                                                                                                                                                                         | To establish an international registry for Myoclonus Dystonia (a rare childhood-onset hyperkinetic movement disorder that can potentially impact function, daily living, and cause significant pain and psychological problems), to characterise the condition and facilitate research. | 141                              |

Table 4: Examples of researcher-led questionnaire modules on the HealthWise Wales platform

| Module name                             | Researcher                                                                       | Main aim of research                                                                                   | Module availability |        |        |        | Status in Sept-18 |
|-----------------------------------------|----------------------------------------------------------------------------------|--------------------------------------------------------------------------------------------------------|---------------------|--------|--------|--------|-------------------|
|                                         |                                                                                  |                                                                                                        | Oct-16              | Apr-17 | Oct-17 | Apr-18 |                   |
| <b>Theme: Improving health services</b> |                                                                                  |                                                                                                        |                     |        |        |        |                   |
| Care for coughs and colds               | Francis et al<br>School of Medicine, Cardiff University                          | To examine patterns of and beliefs relating to consulting behaviours for respiratory tract infections  |                     |        |        |        | 8886              |
| Medicines and their cost                | Yemm et al<br>School of Pharmacy and Pharmaceutical Sciences, Cardiff University | To examine the acceptability of putting the costs of medicines on dispensing labels                    |                     |        |        |        | 6279              |
| Re-use of medicines                     | McRae et al<br>Cwm Taf University Health Board                                   | To investigate public views on the potential for re-dispensing medicines returned unused to pharmacies |                     |        |        |        | 5476              |
| Oral health in children                 | Kemp et al<br>School of Medicine, Cardiff University                             | To examine oral health behaviours and impact of dental disease on children and families                |                     |        |        |        | 5037              |
| <b>Theme: Cancer research</b>           |                                                                                  |                                                                                                        |                     |        |        |        |                   |
| Sun exposure and sun bed use            | Abbott R<br>Cardiff and Vale University Health Board                             | To assess awareness of skin cancer, preventative behaviours and knowledge of vitamin D                 |                     |        |        |        | 6115              |
| Bowel symptoms and cancer awareness     | Dolwani et al<br>School of Medicine, Cardiff University                          | To investigate factors affecting screening, prevention and early diagnosis of bowel cancer             |                     |        |        |        | 5617              |

## Key to modules:

|  |                    |
|--|--------------------|
|  | Live modules       |
|  | Module expiry date |

Figure 1: Website and Consent

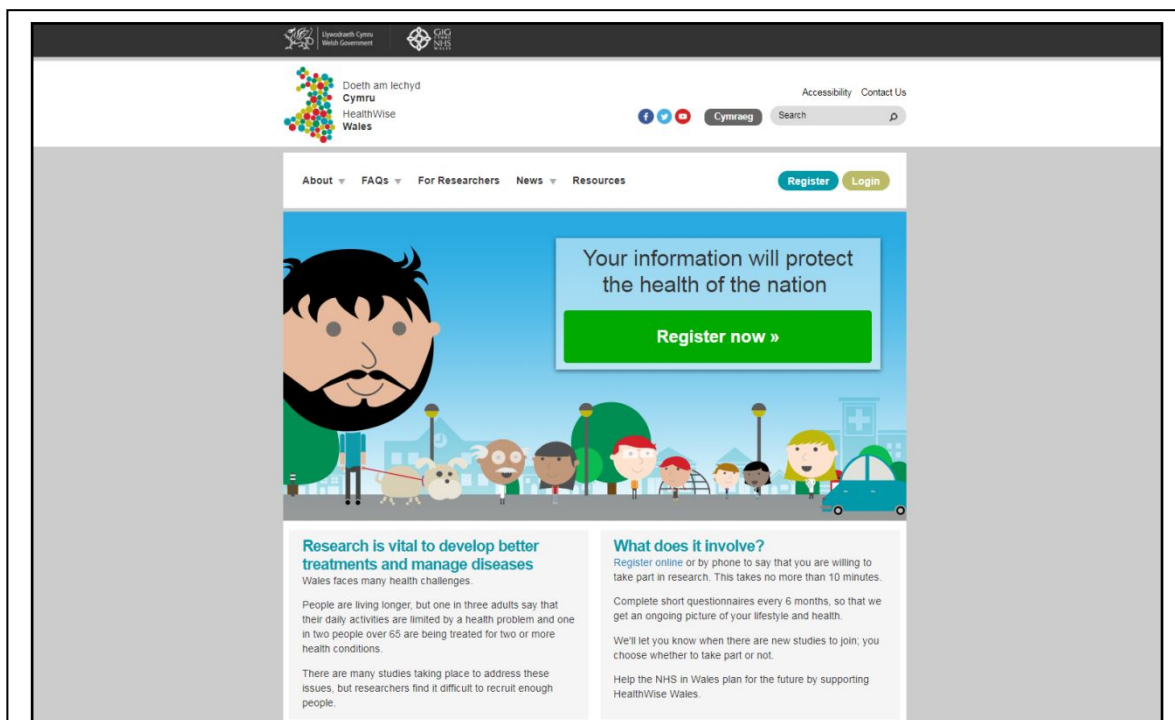

**On clicking the “Register” button, participants are asked to consent to:**

1. Collect baseline personal data.
2. Collect data on lifestyle and health.
3. Allow the research team to use their details to access and use the information in their routinely collected NHS records.
4. Allow the research team to contact the participant every 6 months or so, to be informed of new questionnaires on the system.
5. Allow the research team to contact the participant about public engagement and involvement events and opportunities.
6. Allow the research team to contact the participant about other studies that they may want to take part in.
7. Allow the research team to share anonymous information with other researchers for further research.

Figure 2: HealthWise Wales Data Flow

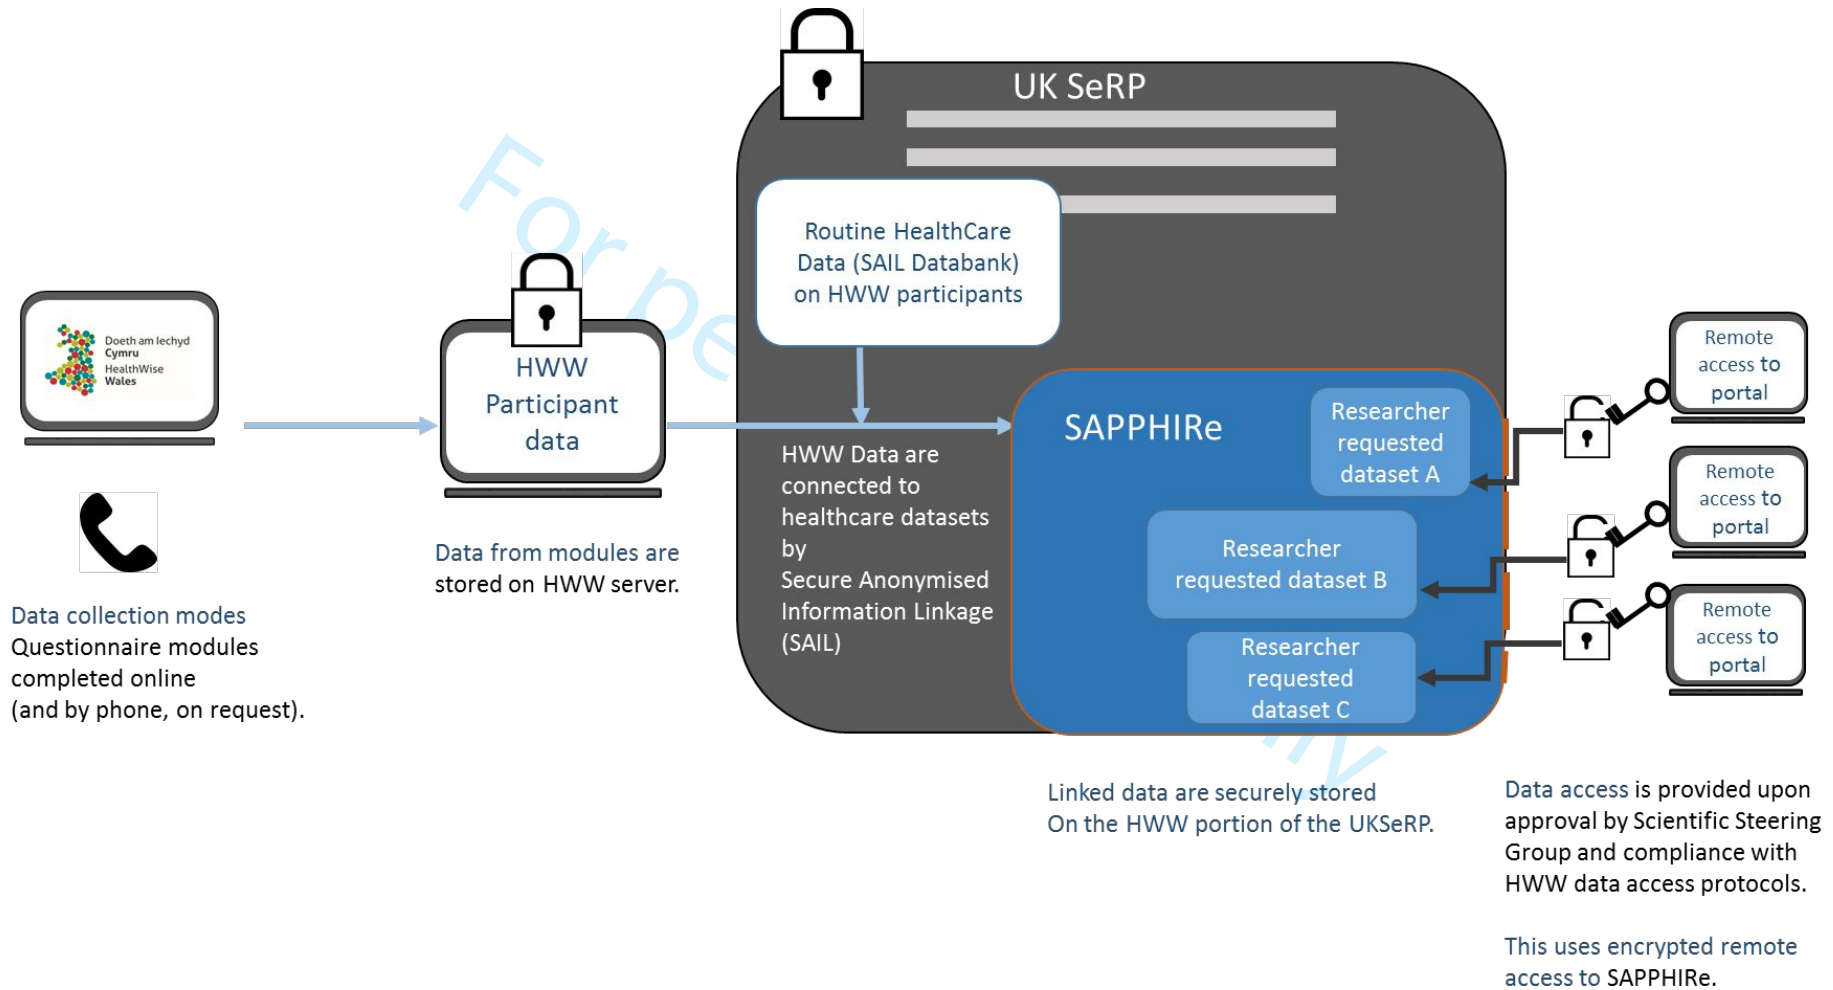

1  
2  
3 **Figure 3: Proportion of participants resident in each quintile of the Welsh Index of**  
4 **Multiple Deprivation, compared with the general Welsh population**  
5  
6  
7  
8  
9

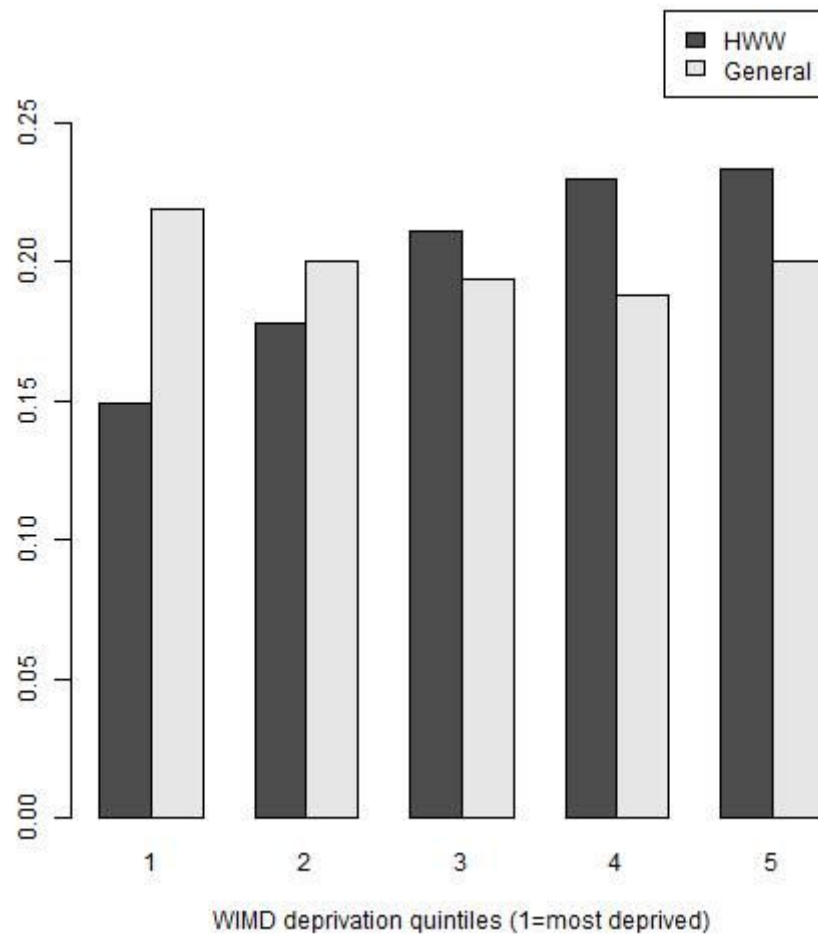

Figure 4: Flow diagram showing the application process for all HWW activities

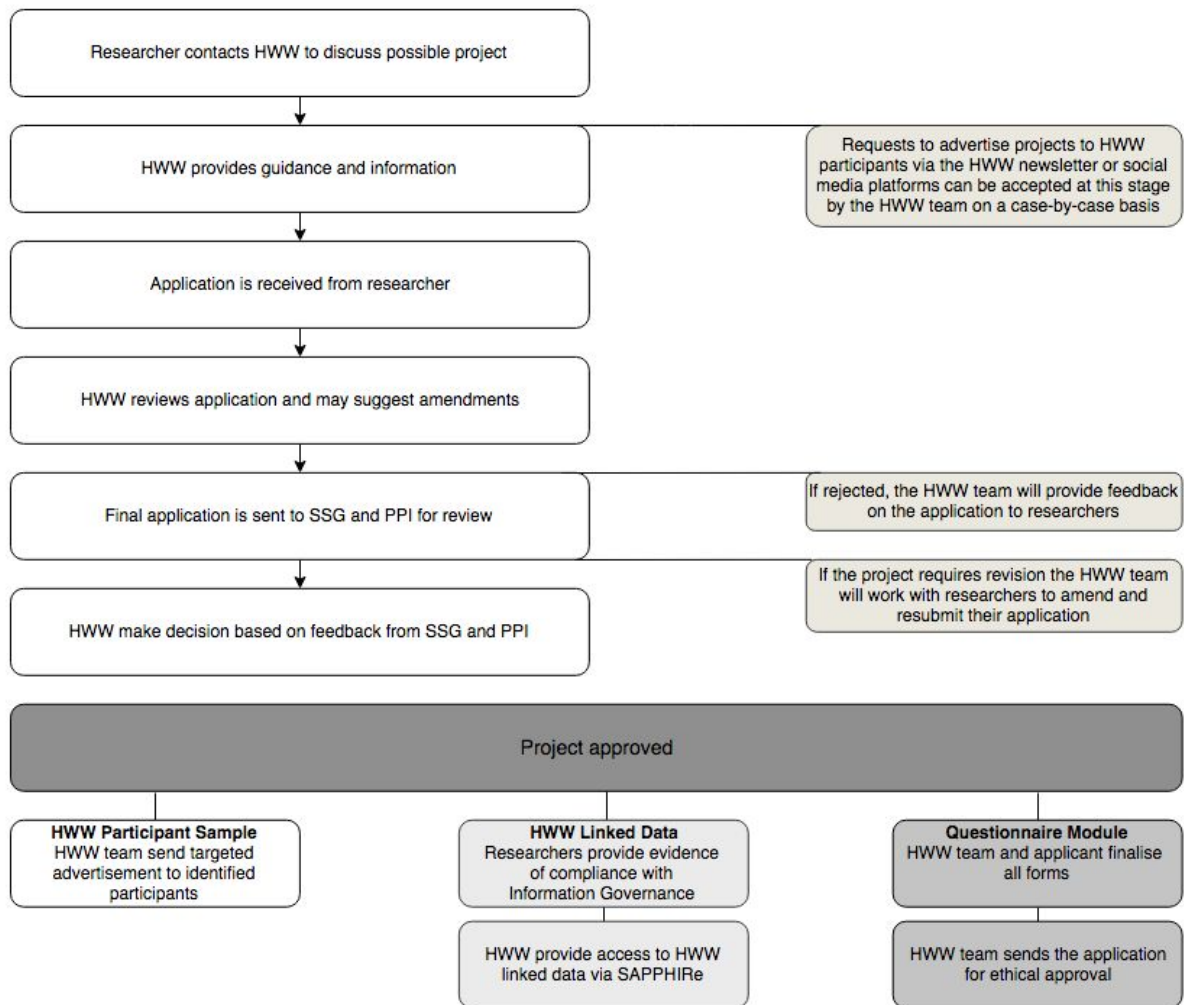

### Timelines

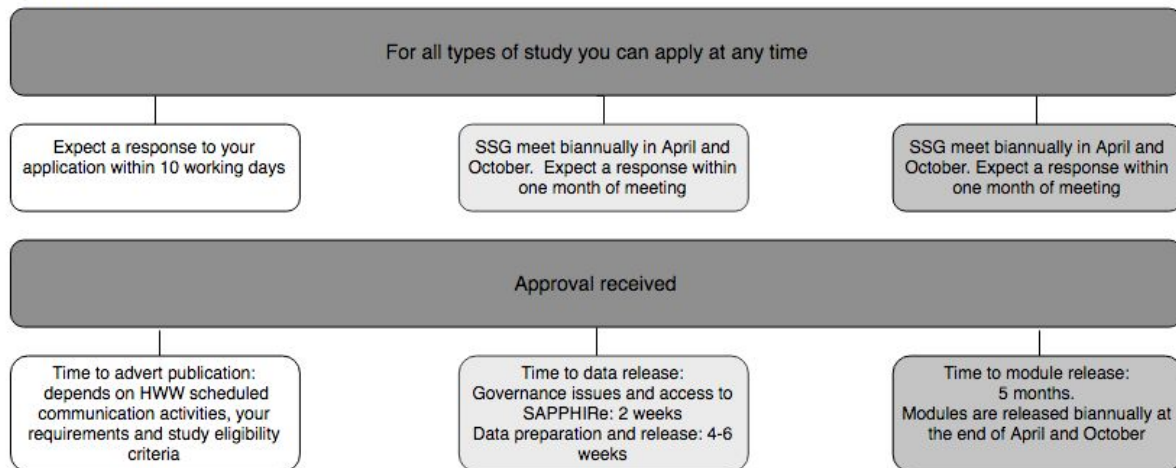

Charges for the use of the HWW platform will be determined on a case by case basis and will be applied to any application approved/actioned after 1 April 2019. Contact the HWW team to discuss.

HWW HealthWise Wales, PPI Patient and Public Involvement, SSG Scientific Steering Group, SAPPPIRe Secure Anonymous Portal and Protected HWW Information Repository



## STROBE Statement—checklist of items that should be included in reports of observational studies

|                              | <b>Item No.</b> | <b>Recommendation</b>                                                                                                                                                                | <b>Page No.</b>                                              |
|------------------------------|-----------------|--------------------------------------------------------------------------------------------------------------------------------------------------------------------------------------|--------------------------------------------------------------|
| <b>Title and abstract</b>    | 1               | (a) Indicate the study's design with a commonly used term in the title or the abstract                                                                                               | 1                                                            |
|                              |                 | (b) Provide in the abstract an informative and balanced summary of what was done and what was found                                                                                  | 2-3                                                          |
| <b>Introduction</b>          |                 |                                                                                                                                                                                      |                                                              |
| Background/rationale         | 2               | Explain the scientific background and rationale for the investigation being reported                                                                                                 | 5                                                            |
| Objectives                   | 3               | State specific objectives, including any prespecified hypotheses                                                                                                                     | Tables 3 & 4                                                 |
| <b>Methods</b>               |                 |                                                                                                                                                                                      |                                                              |
| Study design                 | 4               | Present key elements of study design early in the paper                                                                                                                              | 6-11                                                         |
| Setting                      | 5               | Describe the setting, locations, and relevant dates, including periods of recruitment, exposure, follow-up, and data collection                                                      | 6-8<br>9-10                                                  |
| Participants                 | 6               | (a) <i>Cohort study</i> —Give the eligibility criteria, and the sources and methods of selection of participants. Describe methods of follow-up                                      | 7<br>9                                                       |
|                              |                 | (b) <i>Cohort study</i> —For matched studies, give matching criteria and number of exposed and unexposed                                                                             | Not applicable                                               |
| Variables                    | 7               | Clearly define all outcomes, exposures, predictors, potential confounders, and effect modifiers. Give diagnostic criteria, if applicable                                             | 9-10<br>Tables 1 & 4                                         |
| Data sources/<br>measurement | 8*              | For each variable of interest, give sources of data and details of methods of assessment (measurement). Describe comparability of assessment methods if there is more than one group | Table 1                                                      |
| Bias                         | 9               | Describe any efforts to address potential sources of bias                                                                                                                            | 14-15                                                        |
| Study size                   | 10              | Explain how the study size was arrived at                                                                                                                                            | 8                                                            |
| Quantitative variables       | 11              | Explain how quantitative variables were handled in the analyses. If applicable, describe which groupings were chosen and why                                                         | Not applicable (cohort profile paper, no analyses presented) |
| Statistical methods          | 12              | (a) Describe all statistical methods, including those used to control for confounding                                                                                                | Not applicable (cohort profile paper, no analyses presented) |
|                              |                 | (b) Describe any methods used to examine subgroups and interactions                                                                                                                  |                                                              |
|                              |                 | (c) Explain how missing data were addressed                                                                                                                                          |                                                              |
|                              |                 | (d) <i>Cohort study</i> —If applicable, explain how loss to follow-up was addressed                                                                                                  |                                                              |
|                              |                 | (e) Describe any sensitivity analyses                                                                                                                                                |                                                              |

|                          |     |                                                                                                                                                                                                                                                                                                                                                                                                               |                                                                                  |
|--------------------------|-----|---------------------------------------------------------------------------------------------------------------------------------------------------------------------------------------------------------------------------------------------------------------------------------------------------------------------------------------------------------------------------------------------------------------|----------------------------------------------------------------------------------|
| Participants             | 13* | (a) Report numbers of individuals at each stage of study—eg numbers potentially eligible, examined for eligibility, confirmed eligible, included in the study, completing follow-up, and analysed<br>(b) Give reasons for non-participation at each stage<br>(c) Consider use of a flow diagram                                                                                                               | Not applicable (cohort profile paper, no analyses presented)                     |
| Descriptive data         | 14* | (a) Give characteristics of study participants (eg demographic, clinical, social) and information on exposures and potential confounders<br>(b) Indicate number of participants with missing data for each variable of interest<br>(c) <i>Cohort study</i> —Summarise follow-up time (eg, average and total amount)                                                                                           | 10-11<br>Table 2<br>Not applicable (cohort profile paper, no analyses presented) |
| Outcome data             | 15* | <i>Cohort study</i> —Report numbers of outcome events or summary measures over time                                                                                                                                                                                                                                                                                                                           | Not applicable (cohort profile paper, no analyses presented)                     |
| Main results             | 16  | (a) Give unadjusted estimates and, if applicable, confounder-adjusted estimates and their precision (eg, 95% confidence interval). Make clear which confounders were adjusted for and why they were included<br>(b) Report category boundaries when continuous variables were categorized<br>(c) If relevant, consider translating estimates of relative risk into absolute risk for a meaningful time period | Not applicable (cohort profile paper, no analyses presented)                     |
| Other analyses           | 17  | Report other analyses done—eg analyses of subgroups and interactions, and sensitivity analyses                                                                                                                                                                                                                                                                                                                | Not applicable (cohort profile paper, no analyses presented)                     |
| Key results              | 18  | Summarise key results with reference to study objectives                                                                                                                                                                                                                                                                                                                                                      | Not applicable (cohort profile paper, no analyses presented)                     |
| Limitations              | 19  | Discuss limitations of the study, taking into account sources of potential bias or imprecision. Discuss both direction and magnitude of any potential bias                                                                                                                                                                                                                                                    | 14-15                                                                            |
| Interpretation           | 20  | Give a cautious overall interpretation of results considering objectives, limitations, multiplicity of analyses, results from similar studies, and other relevant evidence                                                                                                                                                                                                                                    | Not applicable (cohort profile paper, no analyses presented)                     |
| Generalisability         | 21  | Discuss the generalisability (external validity) of the study results                                                                                                                                                                                                                                                                                                                                         | 14-15                                                                            |
| <b>Other information</b> |     |                                                                                                                                                                                                                                                                                                                                                                                                               |                                                                                  |
| Funding                  | 22  | Give the source of funding and the role of the funders for the present study and, if applicable, for the original study on which the present article is based                                                                                                                                                                                                                                                 | 13                                                                               |

# BMJ Open

## Cohort Profile: HealthWise Wales. A research register and population health data platform with linkage to National Health Service datasets in Wales

|                                 |                                                                                                                                                                                                                                                                                                                                                                                                                                                                                                                                                                                                                                                                            |
|---------------------------------|----------------------------------------------------------------------------------------------------------------------------------------------------------------------------------------------------------------------------------------------------------------------------------------------------------------------------------------------------------------------------------------------------------------------------------------------------------------------------------------------------------------------------------------------------------------------------------------------------------------------------------------------------------------------------|
| Journal:                        | <i>BMJ Open</i>                                                                                                                                                                                                                                                                                                                                                                                                                                                                                                                                                                                                                                                            |
| Manuscript ID                   | bmjopen-2019-031705.R1                                                                                                                                                                                                                                                                                                                                                                                                                                                                                                                                                                                                                                                     |
| Article Type:                   | Cohort profile                                                                                                                                                                                                                                                                                                                                                                                                                                                                                                                                                                                                                                                             |
| Date Submitted by the Author:   | 01-Aug-2019                                                                                                                                                                                                                                                                                                                                                                                                                                                                                                                                                                                                                                                                |
| Complete List of Authors:       | Hurt, Lisa; Cardiff University School of Medicine, Division of Population Medicine<br>Ashfield-Watt, Pauline; Cardiff University School of Medicine, Division of Population Medicine<br>Townson, Julia; Cardiff University, Centre for Trials Research<br>Heslop, Luke; Cardiff University School of Medicine, Division of Population Medicine<br>Copeland, Lauren; Cardiff University School of Medicine, Division of Population Medicine<br>Atkinson, Mark; Swansea University, Medical School<br>Horton, Jeffrey; Cardiff University, Patient and Public Representative<br>Paranjothy, Shantini; Cardiff University School of Medicine, Division of Population Medicine |
| <b>Primary Subject Heading</b>: | Epidemiology                                                                                                                                                                                                                                                                                                                                                                                                                                                                                                                                                                                                                                                               |
| Secondary Subject Heading:      | Research methods                                                                                                                                                                                                                                                                                                                                                                                                                                                                                                                                                                                                                                                           |
| Keywords:                       | Research database, Data linkage, Adults, Life-course epidemiology, Public and patient involvement                                                                                                                                                                                                                                                                                                                                                                                                                                                                                                                                                                          |
|                                 |                                                                                                                                                                                                                                                                                                                                                                                                                                                                                                                                                                                                                                                                            |

SCHOLARONE™  
Manuscripts

1  
2  
3 1 **Cohort Profile: HealthWise Wales. A research register and population health data platform**  
4  
5  
6 2 **with linkage to National Health Service datasets in Wales**  
7  
8  
9 3

10 4 **Author list**  
11

12  
13 5 Lisa Hurt<sup>1</sup>, Pauline Ashfield-Watt<sup>1</sup>, Julia Townson<sup>2</sup>, Luke Heslop<sup>1</sup>, Lauren Copeland<sup>1</sup>, Mark  
14  
15 6 Atkinson<sup>3</sup>, Jeffrey Horton<sup>4</sup>, Shantini Paranjothy<sup>1\*</sup>  
16  
17

18 7  
19  
20 8 1 Division of Population Medicine, Cardiff University School of Medicine, Cardiff, UK  
21

22 9 2 Centre for Trials Research, College of Biomedical and Life Sciences, Cardiff University,  
23  
24  
25 10 UK  
26

27 11 3 Swansea University Medical School, Swansea, UK  
28

29  
30 12 4 Patient and Public Representative  
31  
32

33 13  
34  
35 14 Word count: 3338  
36  
37

38 15  
39  
40 16 \* Corresponding author: Professor Shantini Paranjothy, [paranjothys@cardiff.ac.uk](mailto:paranjothys@cardiff.ac.uk)  
41  
42

43 17  
44  
45 18 **Keywords:** Research database, data linkage, adults, life-course epidemiology, public  
46  
47 19 involvement  
48  
49  
50  
51  
52  
53  
54  
55  
56  
57  
58  
59  
60

## 20 **Abstract**

21 **Purpose:** Recruitment and follow-up in epidemiological studies is time-consuming and  
22 expensive. Combining online data collection with a register of individuals who agree to be  
23 contacted about research opportunities provides an efficient, cost-effective platform for  
24 population-based research. HealthWise Wales (HWW) aims to facilitate research by recruiting  
25 a cohort of individuals who have consented to be informed about research projects,  
26 advertising studies to participants, supporting data collection on specific topics, and providing  
27 access to linked healthcare data for secondary analyses. In this paper, we describe the design  
28 of the project, ongoing data collection, methods of data linkage to routine healthcare records,  
29 baseline characteristics of participants, the strengths and limitations of the register, and the  
30 ways in which the project can support researchers.

31 **Participants:** Adults (aged 16 and above) living or receiving their healthcare in Wales are  
32 eligible for inclusion. Participants consent to be contacted for follow-up data collection and  
33 for their details to be used to access their routinely-collected NHS records for research  
34 purposes. Data are collected using a web-based application, with new questionnaires added  
35 every six months. Data collection on socio-demographic and lifestyle factors is repeated at  
36 two-to-three year intervals. Recruitment is ongoing, with 21,779 participants alive and  
37 currently registered.

38 **Findings to date:** 99% of participants have complete information on age and sex, and 64%  
39 have completed questionnaires on socio-demographic and lifestyle factors. These data can  
40 be linked with national health databases within the Secure Anonymised Information Linkage  
41 (SAIL) databank, with 93% of participants matching a record in SAIL. HWW has facilitated the  
42 recruitment of 43,826 participants to 15 different studies.

1  
2  
3 43 **Future plans:** The medium-term goal for the project is to enrol at least 50,000 adults.  
4  
5  
6 44 Recruitment strategies are being devised to achieve a study sample that closely models the  
7  
8 45 population of Wales. Potential bio-sampling methods are also currently being explored.  
9

10 46  
11  
12  
13  
14  
15  
16  
17  
18  
19  
20  
21  
22  
23  
24  
25  
26  
27  
28  
29  
30  
31  
32  
33  
34  
35  
36  
37  
38  
39  
40  
41  
42  
43  
44  
45  
46  
47  
48  
49  
50  
51  
52  
53  
54  
55  
56  
57  
58  
59  
60

For peer review only

1  
2  
3 47 **Strengths and limitations**  
4

- 5  
6 48 • More than 20,000 individuals with a diverse socio-demographic profile have registered,  
7  
8 49 and recruitment is ongoing.  
9  
10 50 • Matching rates of participant data with routinely-collected healthcare records are very  
11  
12 51 high.  
13  
14 52 • Participants are “research ready”, with HWW facilitating the recruitment of 43,826  
15  
16 53 participants to 15 different studies to date.  
17  
18 54 • Men, individuals below 25 and over the age of 65, and participants from the most  
19  
20 55 deprived wealth quintiles are currently under-represented. Recruitment strategies to  
21  
22 56 increase the number of participants in these groups are currently being devised.  
23  
24 57 • Currently, bio-samples are not collected from participants, although options for this are  
25  
26 58 currently being explored.  
27  
28  
29  
30  
31  
32  
33  
34  
35  
36  
37  
38  
39  
40  
41  
42  
43  
44  
45  
46  
47  
48  
49  
50  
51  
52  
53  
54  
55  
56  
57  
58  
59  
60

## 60 Introduction

61 High-income countries continue to face major public health challenges, including persistent  
62 inequalities in health and wellbeing and the complex needs of ageing populations (1, 2).  
63 Meeting these challenges requires a strong research infrastructure to ensure that high quality  
64 evidence is generated, for example, on preventing the onset and progression of non-  
65 communicable diseases and providing effective and efficient health and care services (3).  
66 Large-scale longitudinal studies are an essential resource for studying health and wellbeing  
67 throughout the life course. It is estimated that around 3.5% of the UK population are current  
68 or recent contributors to cohort studies (4). Using web-based technologies potentially makes  
69 recruitment and retention of subjects in such long-term studies less time-consuming and  
70 expensive (5). Combining online data collection with a register of individuals who have  
71 volunteered to be contacted with opportunities to take part in research also confers  
72 additional efficiency (such as the Scottish Health Research Register, SHARE (6)), and can  
73 create a platform to increase public involvement and engagement with research. Increasing  
74 awareness of the purpose of research and opportunities for participation should result in  
75 increased recruitment to research studies, better quality research to inform policy and  
76 practice, and ultimately improved population health outcomes (7).

77  
78 Wales has a population of over three million people, within clearly defined geographical  
79 boundaries and with relatively low levels of migration in or out (8). It faces major challenges  
80 from a post-industrial legacy of socio-economic deprivation and a high prevalence of  
81 unhealthy behaviours (3, 9). High-quality, population-based research in this setting has  
82 already provided important evidence for policy and practice in the United Kingdom and



1  
2  
3 83 beyond (10). HealthWise Wales (HWW) aims to provide an integrated cost-effective platform  
4  
5  
6 84 for conducting population-based research, by:  
7  
8  
9

- 10  
11 86 1. Establishing a cohort of individuals who have consented to be contacted with information  
12  
13 87 on research studies that they may wish to contribute to (so-called “research-ready”  
14  
15 88 individuals);  
16  
17  
18 89 2. Collecting longitudinal data from participants on self-reported exposures and outcomes;  
19  
20 90 and  
21  
22  
23 91 3. Using routinely-available healthcare data through record linkage (11, 12).  
24  
25  
26  
27

28 93 Overall, HWW plans to contribute to shape the health and wellbeing of future generations in  
29  
30 94 Wales, and help the National Health Service (NHS) in Wales plan for the future. In this paper,  
31  
32 95 we describe the design of the project, ongoing data collection, methods of data linkage to  
33  
34  
35 96 routine healthcare records, baseline characteristics of participants, the strengths and  
36  
37 97 limitations of the register, and the ways in which the project can support researchers.  
38  
39  
40  
41

## 42 99 **Cohort Description**

### 43 44 45 100 *Setting*

46  
47 101 Recruitment into HWW is ongoing and dynamic, with individuals joining (or leaving) on a  
48  
49 102 continuous basis and with varying levels of participation during their life course. Recruitment  
50  
51  
52 103 started during a pilot phase (March 2015 to February 2016), followed by a public launch on  
53  
54 104 February 29<sup>th</sup> 2016. Recruitment protocols have been designed to ensure representation  
55  
56  
57 105 across all areas of Wales. Overall, the distribution of HWW participants by residence is  
58  
59 106 representative of Wales. For example, census data show that 67% of the Welsh population

1  
2  
3 107 live in urban areas (defined as settlements of at least 10,000 people) (13), compared with 63%  
4  
5  
6 108 in HWW.

7  
8 109

9  
10 110 *Eligibility criteria and participant recruitment*

11  
12  
13 111 Adults (aged 16 or above) who are usually resident or receive their healthcare in Wales are  
14  
15 112 eligible to join, and are invited to be:

16  
17  
18 113

- 19  
20 114 1. Followed up at regular intervals to obtain information about their health, wellbeing and  
21  
22 specific exposures (such as behavioural risk factors), and allow record-linkage with their  
23 115  
24 routinely-collected health records;  
25 116  
26  
27 117 2. Entered onto a database of potential participants for research studies;  
28  
29  
30 118 3. Contacted to take part in specific research studies;  
31  
32  
33 119 4. Actively engaged and involved in dialogue to shape the priorities of the research  
34  
35 120 programme.

36  
37 121

38  
39  
40 122 Television, radio and social media advertising campaigns have been undertaken to issue an  
41  
42 123 open invitation to potential participants to register. The project has been promoted at a wide  
43  
44 124 range of events across Wales (for example, cultural events such as the Eisteddfod and  
45  
46 125 agricultural shows such as the Royal Welsh and Anglesey shows) and in different settings  
47  
48 (such as NHS hospitals, general practices, pharmacy outlets, and large employers). Mass  
49 126  
50 postal mail-outs have also been piloted in one Health Board area, and there are plans to  
51  
52 127 extend this method of communication about the project to other areas of Wales.  
53  
54 128

55  
56  
57 129

1  
2  
3 130 There are three core recruitment methods that are adapted for use as appropriate in different  
4  
5  
6 131 settings. Participants can give their consent to join the project through an online web  
7  
8 132 application, which is accessed via the project's website ([www.healthwisewales.gov.wales](http://www.healthwisewales.gov.wales), see  
9  
10 133 Figure 1). They can also be recruited face-to-face using tablets or paper-based sign-up forms  
11  
12  
13 134 at events and various locations across Wales, or can give their consent to be contacted by  
14  
15 135 individuals from the Participant Resource Centre at Cardiff University who can provide them  
16  
17 136 with further information about HWW by email or telephone. Protocols describing the use of  
18  
19 137 these recruitment methods and relevant study materials in various settings have been  
20  
21 138 developed and have been implemented by HWW champions (members of the public who  
22  
23 139 have volunteered to engage and involve other members of the public) and  
24  
25 140 facilitators/research assistants (Health and Care Research Wales and NHS support and  
26  
27 141 delivery staff). A range of recruitment and data collection strategies have also been developed  
28  
29 142 for individuals who do not have internet access and/or may not have been exposed to the  
30  
31 143 advertising campaigns. These have included study recruiters using mobile technologies with  
32  
33 144 an internet connection to collect data at community-based locations, or telephone-based  
34  
35 145 consent and data collection.  
36  
37  
38  
39  
40  
41  
42  
43  
44

45 147 The medium term goal is to enrol at least 50,000 adults. This proposed sample size will be  
46  
47 148 significantly larger than current population-based surveys in Wales, providing more precise  
48  
49 149 estimates of the prevalence of exposures and outcomes in different socio-demographic  
50  
51 150 groups, and adequate power to answer a range of different research questions about the  
52  
53 151 determinants of health and wellbeing.  
54  
55  
56  
57  
58

59 153 *Research themes*  
60

1  
2  
3 154 The project has five research themes:  
4  
5

6 155  
7

8 156 1. Impact of social inequalities on health and wellbeing;  
9

10 157 2. Environment, neighbourhood and health;  
11  
12

13 158 3. Maintenance of health and wellbeing in the working age population;  
14

15 159 4. Wellbeing in later life; and  
16

17 160 5. Innovation in health and social care services.  
18  
19

20 161  
21  
22

23 162 These themes are broad to guide data collection and facilitate use of the HWW platform by a  
24  
25 163 wide range of health and social care researchers. Across these themes, there is a focus on  
26  
27 164 four health areas (cancer, mental health, dementia and family life, pregnancy and early  
28  
29 165 childhood health and development).  
30  
31

32 166  
33  
34

35 167 *Methods of data collection and follow-up*  
36

37 168 Data are collected using a web-based application, designed specifically for the project, which  
38  
39 169 is accessible to participants through the main HWW website. New questionnaires are added  
40  
41 170 every six months. These either collect information on items relevant to the research themes  
42  
43 171 outlined above, or bespoke data to facilitate researcher-led projects that are aligned to the  
44  
45 172 research themes. Descriptive information on the core research questionnaires, their  
46  
47 173 availability to participants since the project launched in 2015, and completion numbers are  
48  
49 174 presented in Table 1. These collect data on socio-demographic factors, lifestyle factors, home  
50  
51 175 life, and mental health at baseline and will be repeated at two-to-three year intervals as  
52  
53 176 appropriate. There is also an additional set of modified core questionnaires that collect  
54  
55 177 information from pregnant women on their health and care.  
56  
57  
58  
59  
60

178

179 Outcome data are obtained in two ways. First, data are collected on the HWW platform for  
180 patient-reported outcome measures and those relevant to conditions likely to be under-  
181 represented in routinely-collected data (for example, infections, metabolic diseases,  
182 psychiatric conditions and wellbeing). Second, outcome information can be obtained through  
183 record linkage with national health databases (such as the Patient Episode Database for Wales  
184 and general practice data) within the Secure Anonymised Information Linkage (SAIL) databank  
185 (11, 12). Future phases of the project will also include linkage with other administrative  
186 datasets.

187

188 The NHS Wales Informatics Service (NWIS, a trusted third party) uses the personal details of  
189 participants (with their consent) to generate an anonymised linking field (ALF\_E) based on  
190 their name, address, gender and date of birth. This is used to link participants' data with  
191 routinely-collected healthcare data sets, with 93% of active participants matching with a  
192 record in SAIL. The SAIL databank and the Secure Access Portal and Protected HWW  
193 Information Repository (SAPPHIRE) are stored in separate areas of the UK Secure e-Research  
194 Platform (UKSeRP, (14)). Figure 2 shows the flow of project data, showing SAPPHIRE within  
195 UKSeRP where project-specific, anonymised HWW data can be accessed.

196

### 197 *Patient and public involvement*

198 HWW has a specific focus on increasing public involvement and engagement in health and  
199 social care research. To ensure these aims are achieved, the project is overseen by a Public  
200 Involvement Delivery Board (PIDB), which is chaired by an independent member of the public  
201 and whose membership is predominantly comprised of members of the public. The PIDB

1  
2  
3 202 provides scrutiny and assurance that the project is operating in the public interest, and  
4  
5  
6 203 provides advice and support in delivering best practice in accordance with the National  
7  
8 204 Standards for Public Involvement ([https://www.invo.org.uk/posttypepublication/national-](https://www.invo.org.uk/posttypepublication/national-standards-for-public-involvement/)  
9  
10 standards-for-public-involvement/). The Board and the research team co-produced the  
11  
12  
13 206 project's Patient and Public Involvement (PPI) policy and implementation plan. The research  
14  
15  
16 207 team has a dedicated PPI lead who is responsible for maintaining the policy document and  
17  
18 208 ensuring compliance with it. All research team members are trained on facilitating public  
19  
20  
21 209 involvement. There are two PPI members of the research team, who have agreed objectives  
22  
23 210 for their role and attend monthly meetings where they are actively involved in discussions  
24  
25 211 and decision-making relating to research team activities. We have also trained 78 local health  
26  
27  
28 212 board members as facilitators to engage the public and recruit participants to HWW.  
29  
30 213  
31  
32 214 Involvement opportunities (including participation in media promotions or development and  
33  
34  
35 215 user-testing of data collection questionnaires) are regularly offered to participants through a  
36  
37  
38 216 quarterly e-newsletter. As a result, three participants became the faces of the advertising  
39  
40 217 campaign in March 2017, others have participated in social media promotions, and 156  
41  
42 218 agreed to be members of a user-testing panel.  
43  
44  
45 219  
46  
47 220 PPI is an essential criterion for all studies that use HWW, and researchers are required to  
48  
49  
50 221 describe the PPI they have undertaken when applying to use the data or the platform. PPI  
51  
52 222 research team members scrutinise this element of applications as part of their overall  
53  
54  
55 223 assessment of all new projects.  
56  
57 224  
58  
59 225 *Ethical approval and governance arrangements*  
60

1  
2  
3 226 The project is overseen by an Executive Group, which provides oversight and decision making  
4  
5  
6 227 on the overall delivery of initiative, and receives advice from a Scientific Steering Group (SSG)  
7  
8 228 and the Public Involvement Delivery Board. The role of the PIDB has been described above.  
9  
10 229  
11  
12  
13 230 HWW received ethical approval from Wales Research Ethics Committee (REC) 3 on 16th  
14  
15 231 March 2015 (reference 15/WA/0076). Substantial amendments are submitted when new  
16  
17 232 questionnaires are added or if there is a substantial change to the content of participant-  
18  
19 233 facing materials or recruitment model, in line with current guidance from the committee. The  
20  
21 234 data collection system and study processes are designed to safeguard the integrity and  
22  
23 235 confidentiality of data collected and generated for HWW research, and appropriate systems  
24  
25 236 have been established and tested to report any failures in these respects. Standard Operating  
26  
27 237 Procedures (SOPs) are in place to ensure that HWW is conducted within research governance  
28  
29 238 regulations and compliant with the General Data Protection Regulation (GDPR) (EU)  
30  
31 239 2016/679. The research team meet with the HWW Data Guardian every six months to review  
32  
33 240 the data governance processes in place and any matters arising.  
34  
35  
36  
37  
38  
39  
40  
41

241

#### 242 *Funding*

243 HWW is funded by Health and Care Research Wales.  
244

245

#### 245 **Findings to date**

246 There are currently more than 20,000 active participants (alive and currently registered).  
247 Ninety-nine percent of registered participants have complete information on age and sex, and  
248 at least 64% have completed the other core questionnaires. Table 2 shows the characteristics  
249 of active participants compared with data from published sources of Welsh data. Compared

1  
2  
3 250 with the population of Wales, there is a higher percentage of participants who are 45 to 64  
4  
5  
6 251 years old. The percentage of women is higher than in the general population (72% compared  
7  
8 252 with 51%). The percentage of participants in non-white ethnic groups (2%) is the same as in  
9  
10  
11 253 the general population. Fifty percent of participants are classified as being in higher  
12  
13 254 managerial or professional occupations, compared with 27% of the population of Wales. In  
14  
15 255 terms of health-related behaviours: 56% are classified as active or moderately active; 10% are  
16  
17 256 current smokers (compared with 19% of the general population); and 50% drink more alcohol  
18  
19  
20 257 than recommended by UK guidance (compared with 40% of the general population). Twenty-  
21  
22  
23 258 eight percent of participants have a Mental Health Inventory score consistent with a common  
24  
25 259 mental disorder and 32% have been diagnosed with or treated for a mental health condition  
26  
27  
28 260 (compared with 13% of the general population). Figure 3 shows the distribution of  
29  
30 261 participants according to the Welsh Index of Multiple Deprivation compared with the  
31  
32  
33 262 population of Wales. There is a good representation of participants in each deprivation  
34  
35 263 quintile, although a higher percentage of participants are from the least deprived quintile.  
36  
37  
38  
39

264

### 265 **Research activities**

41  
42 266 HealthWise Wales supports researchers in three ways by: advertising relevant studies to  
43  
44  
45 267 participants; providing access to cohort data for secondary analyses via the researcher portal;  
46  
47 268 and supporting data collection on specific topics within the platform that can then be linked  
48  
49  
50 269 with healthcare data. To date, seven studies have used the database to inform potential  
51  
52 270 participants of an opportunity to take part in their research (see Table 3), with recruitment  
53  
54  
55 271 for each of these exceeding the required target. Nine studies have used the platform to  
56  
57 272 collect data on study-specific questionnaires (see Table 4), with more than 5,000 participants  
58  
59 273 providing data for each of these. In total, HWW has facilitated the recruitment of 43,826  
60



1  
2  
3 274 participants to 15 different studies to date, with many of the 21,779 registrants taking part in  
4  
5  
6 275 multiple studies. Results from these studies are now being published including, for example,  
7  
8 276 an analysis of patients' reasons for consulting a general practitioner when they had a dental  
9  
10  
11 277 problem (15). Links to all publications that have used HWW to recruit participants will be  
12  
13 278 included on the project website.

14  
15 279

### 16 280 **Strengths and limitations**

17  
18 281 There are several strengths of HWW as a resource for research. More than 20,000 individuals  
19  
20  
21 282 with a diverse socio-demographic profile have already registered, and recruitment is ongoing.  
22  
23 283 Matching rates of participant data with routinely-collected healthcare records are very high.  
24  
25 284 In contrast with other population-based cohorts in the UK (4), HWW participants are younger,  
26  
27 285 with most between 30 and 60 years old. This provides an opportunity to conduct longitudinal  
28  
29 286 population studies with data collected pre-disease onset. Participants are also "research  
30  
31 287 ready"; the examples given above demonstrate that the platform provides an effective way  
32  
33 288 for the research community to reach an engaged, responsive cohort. A targeted retention  
34  
35 289 plan is being developed with PPI representatives and a wider stakeholder group to encourage  
36  
37 290 continued active participation in the project. Strategies found by other studies to be effective  
38  
39 291 will be adapted to suit the HWW cohort, including the provision of real-time feedback to  
40  
41 292 participants when they provide data, the development of an online community where  
42  
43 293 participants can share their research experiences, and regular, diverse public engagement  
44  
45 294 events to disseminate emerging results.

46 295

47 296 Men are currently under-represented in the cohort; only 28% of registered participants are  
48  
49 297 male. Similarly, there are fewer individuals below 25 and over the age of 65 than in the

1  
2  
3 298 general population, and a smaller percentage of participants from routine and manual  
4  
5  
6 299 occupations and in the most deprived wealth quintiles. To address this, we are currently  
7  
8 300 undertaking qualitative research using a stratified sampling frame (based on age and gender)  
9  
10 301 in deprived areas of Wales. We are recruiting engaged and disengaged participants with the  
11  
12  
13 302 aim of understanding motivations and barriers to participating in HWW and collecting  
14  
15 303 suggestions from them for future communications, marketing and interactive activities that  
16  
17  
18 304 would appeal to under-represented segments of the population. Focus group participants will  
19  
20 305 be asked to comment on recruitment strategies that are currently being considered including  
21  
22  
23 306 arts-based workshops, and celebrity and local ambassador programmes. Our retention and  
24  
25 307 recruitment strategies will inform and reinforce each other. A key feature of both will be  
26  
27  
28 308 participant involvement in design and development of these activities to promote a two-way,  
29  
30 309 dynamic flow of information between the research team, participants and members of the  
31  
32  
33 310 public to encourage greater public involvement with research. The aim is to achieve a study  
34  
35 311 sample that closely models the population of Wales, with sufficient numbers in socio-  
36  
37 312 demographic subgroups to allow for the selection of populations for research from those  
38  
39  
40 313 groups. For example, the cohort currently includes 5,000 men, providing a substantial sample  
41  
42 314 size that will be adequate for some analyses.  
43  
44  
45 315

46  
47 316 Research registers, such as SHARE Scotland (6), are increasingly recognised as an effective and  
48  
49  
50 317 efficient way of supporting recruitment for research. Not all registers operate in the same  
51  
52 318 way. For example, SHARE Scotland uses information from the NHS records of their registrants  
53  
54  
55 319 to determine their suitability for individual projects. HWW plans to offer this option to  
56  
57 320 researchers in future. SHARE Scotland does not collect self-reported exposure and outcome  
58  
59 321 information from participants, whereas HWW does. Lastly, SHARE Scotland gives participants  
60

1  
2  
3 322 the opportunity to consent to the storage and use of “spare” blood (blood remaining from  
4  
5 323 tests taken within the NHS), which can then be used in approved medical research. Currently,  
6  
7  
8 324 bio-samples are not collected from HWW participants. Formative research examining the  
9  
10 325 willingness of individuals to provide different types of biological samples for research as part  
11  
12  
13 326 of their participation in HWW showed that 83% would be willing to do so. Options for a  
14  
15 327 strategic approach to bio-sampling across Wales, and therefore a future enhancement that  
16  
17  
18 328 will increase the value of this cohort, are currently being explored.  
19

20 329

### 21 22 23 330 **Collaboration**

24  
25 331 Figure 4 shows the application process for all research activities that can be undertaken using  
26  
27 332 the HWW platform. All documentation informing researchers of how to apply to use the  
28  
29 333 HWW platform was made public in June 2018, and access to the data has been possible since  
30  
31 334 September 2018. A guide for researchers giving full details of the application and review  
32  
33 335 process, and a copy of the application form, are available on the study website  
34  
35 336 ([www.healthwisewales.gov.wales/for-researchers](http://www.healthwisewales.gov.wales/for-researchers)).  
36  
37  
38  
39

40 337

41  
42 338 Requests to advertise projects to HWW participants via newsletters or social media are  
43  
44 339 reviewed on a case-by-case basis by the HWW research team. The HWW ethical approval and  
45  
46 340 participant consent permit HWW to advertise research projects to registered participants as  
47  
48  
49 341 long as they fit with the ethos and scope of the initiative. It is the responsibility of applicants  
50  
51 342 to obtain ethical approval for the conduct of their specific study before HWW advertises it to  
52  
53 343 participants. This ethical approval should specify that HWW will be used to help recruit  
54  
55 344 participants.  
56  
57  
58  
59

60 345

1  
2  
3 346 Applications to use HWW for data collection or analysis are reviewed by the SSG and by PPI  
4  
5  
6 347 representatives, to assess that the project fits with the ethos of HWW, is scientifically sound,  
7  
8 348 and that adequate PPI input has been sought in the development of the proposal. Once  
9  
10 349 approved, researchers work closely with the HWW research team to deliver the project,  
11  
12  
13 350 including working together to prepare the application for a substantial amendment to the  
14  
15 351 HWW ethical approval (which is needed for all new data collection). Researchers will need to  
16  
17 352 provide evidence that they are bona fide researchers and have appropriate training in  
18  
19  
20 353 Research Data and Confidentiality procedures in order to gain access to the HWW data  
21  
22  
23 354 repository via SAPPHIRE.

24  
25 355

26  
27 356 Further details on how to apply, and the requirements for access and acknowledgements for  
28  
29  
30 357 publication, can be found in the Researcher Guidance document on the Researcher tab of the  
31  
32 358 HWW website: [www.healthwisewales.gov.wales/for-researchers/](http://www.healthwisewales.gov.wales/for-researchers/). Researchers should  
33  
34  
35 359 contact the research team (on [healthwisewales@cardiff.ac.uk](mailto:healthwisewales@cardiff.ac.uk) or 0800 9172 172) before  
36  
37 360 submitting their application to obtain guidance on how best to use the platform in their study,  
38  
39  
40 361 patient and public involvement processes, ethical requirements, questionnaire development,  
41  
42 362 implementation and promotion.

43  
44  
45 363

46  
47 364 In conclusion, HWW is a research database of adults (aged 16 and above) living or receiving  
48  
49  
50 365 their healthcare in Wales that can support researchers by: advertising relevant studies to  
51  
52 366 registered participants; providing access to cohort data for secondary analyses via the  
53  
54 367 researcher portal; and supporting data collection on specific topics with record-linkage to  
55  
56  
57 368 healthcare data if required. It has been successful in recruiting a “research ready” cohort in  
58  
59 369 Wales, and to date has facilitated recruitment of 43,826 participants into 15 studies.  
60

1  
2  
3 370 **Acknowledgements**  
4

5  
6 371 We gratefully acknowledge the contribution of Charlotte Bonner-Evans and Ameeta  
7  
8 372 Richardson in the coordination, management and implementation of the platform. We would  
9  
10 373 also like to thank Sean Dunn, Benjamin Dowie, Alex Coomber and others within the  
11  
12  
13 374 Participant Resource Centre (Cardiff University) and the Health and Care Research Wales  
14  
15 375 Support and Delivery Centre for their contribution to recruitment and data collection, and the  
16  
17 376 Welsh Government Communication team for their contribution to the Communications Plan.  
18  
19  
20 377 We acknowledge the substantial contribution of the Scientific Steering Group, the HealthWise  
21  
22  
23 378 Wales Executive group, the Public Involvement Delivery Board, Chris Stock, the Centre for  
24  
25 379 Trials Research and Professor Mike Robling (Data Guardian). We also thank the participants.  
26  
27

28 380  
29  
30  
31  
32  
33  
34  
35  
36  
37  
38  
39  
40  
41  
42  
43  
44  
45  
46  
47  
48  
49  
50  
51  
52  
53  
54  
55  
56  
57  
58  
59  
60

1  
2  
3 381 **Contributorship statement**  
4

5 382 SP is the principal investigator of HealthWise Wales. LH, PAW, JT, LH, LC, MA, JH and SP  
6  
7  
8 383 contributed to the conceptualization of the project, data collection and analysis methods, and  
9  
10 384 recruitment and retention methods. LH and SP wrote the first draft of this paper. LH, PAW,  
11  
12  
13 385 JT, LH, LC, MA, JH and SP contributed to the text of the paper, subsequent revisions and the  
14  
15 386 production of the final version of the paper.  
16

17  
18 387

19  
20 388 **Competing interests**  
21

22  
23 389 The authors declare no competing interests  
24

25 390  
26

27  
28 391 **Funding**  
29

30 392 HealthWise Wales is funded by Health and Care Research Wales.  
31

32 393  
33

34  
35 394 **Data sharing statement**  
36

37 395 The application process for all research activities that can be undertaken using the HWW  
38  
39  
40 396 platform (including data collection, analysis and advertising of research projects to HWW  
41  
42 397 participants) is described in the paper. A guide for researchers giving full details of the  
43  
44 398 application and review process, and a copy of the application form, are available on the study  
45  
46 399 website ([www.healthwisewales.gov.wales/for-researchers](http://www.healthwisewales.gov.wales/for-researchers)).  
47  
48  
49  
50  
51  
52  
53  
54  
55  
56  
57  
58  
59  
60

1  
2  
3 400 **References**  
4

- 5  
6 401 1. Marmot, M. The health gap. The challenge of an unequal world London: Bloomsbury  
7  
8 402 Publishing; 2015.  
9  
10 403 2. Prince M, Wu F, Guo Y, Robledo L, O'Donnell M, Sullivan R, et al. The burden of disease  
11  
12 404 in older people and implications for health policy and practice. The Lancet. 2015; 385(9967):  
13  
14 405 549-62.  
15  
16 406 3. Chief Medical Officer. Chief Medical Officer for Wales Annual Report 2015-16.  
17  
18 407 Rebalancing healthcare. Working in partnership to reduce social inequity. Cardiff: Welsh  
19  
20 408 Government; 2016.  
21  
22 409 4. Medical Research Council. Maximising the value of UK population cohorts. MRC  
23  
24 410 Strategic Review of the Largest UK Population Cohort Studies. London: Medical Research  
25  
26 411 Council; 2014.  
27  
28 412 5. Manolio T, Weis B, Cowie C, Hoover R, Hudson K, Kramer B, et al. New models for large  
29  
30 413 prospective studies: is there a better way? American Journal of Epidemiology.  
31  
32 414 2012;175(9):859-66.  
33  
34 415 6. McKinstry B, Sullivan F, Vasishta S, Armstrong R, Hanley J, Haughney J, et al. Cohort  
35  
36 416 profile: the Scottish Research register SHARE. A register of people interested in research  
37  
38 417 participation linked to NHS data sets. BMJ Open. 2017;7(2):e013351.  
39  
40 418 7. Staley K. 'Is it worth doing?' Measuring the impact of patient and public involvement  
41  
42 419 in research. Research Involvement and Engagement. 2015;1(1):6.  
43  
44 420 8. Office for National Statistics. Statistical Bulletin. Population estimates for the UK,  
45  
46 421 England and Wales, Scotland and Northern Ireland: mid-2017. London: Office for National  
47  
48 422 Statistics; 2018.  
49  
50  
51  
52  
53  
54  
55  
56  
57  
58  
59  
60

- 1  
2  
3 423 9. Chief Medical Officer. Chief Medical Officer for Wales Annual Report 2014-15.  
4  
5  
6 424 Healthier, happier, fairer Cardiff: Welsh Government; 2015.  
7  
8 425 10. Elwood P, Galante J, Pickering J, Palmer S, Bayer A, Ben-Shlomo Y, et al. Healthy  
9  
10 426 lifestyles reduce the incidence of chronic diseases and dementia: evidence from the Caerphilly  
11  
12 427 cohort study. PLoS One. 2013;8(12):e81877.  
13  
14  
15 428 11. Ford D, Jones K, Verplancke J, Lyons R, John G, Brown G, et al. The SAIL Databank:  
16  
17 429 building a national architecture for e-health research and evaluation. BMC Health Services  
18  
19 430 Research. 2009;9(1):157.  
20  
21  
22 431 12. Lyons R, Jones K, John G, Brooks C, Verplancke J, Ford D, et al. The SAIL databank:  
23  
24 432 linking multiple health and social care datasets. BMC Medical Informatics and Decision  
25  
26 433 Making. 2009;9(1):3.  
27  
28 434 13. Office for National Statistics. 2011 Census Analysis - Comparing Rural and Urban Areas  
29  
30 435 of England and Wales. London: Office for National Statistics; 2013.  
31  
32  
33 436 14. Jones K, Ford D, Jones C, Dsilva R, Thompson S, Brooks C, et al. A case study of the  
34  
35 437 Secure Anonymous Information Linkage (SAIL) Gateway: a privacy-protecting remote access  
36  
37 438 system for health-related research and evaluation. Journal of Biomedical Informatics.  
38  
39 439 2014;50:196-204.  
40  
41  
42 440 15. Cope A, Wood F, Francis N, Chestnutt I. Patients' reasons for consulting a GP when  
43  
44 441 experiencing a dental problem: a qualitative study. Br J Gen Pract. 2018;68(677):e877-e83.  
45  
46  
47  
48  
49  
50 442



1  
2  
3  
4  
5  
6  
7  
8  
9  
10  
11  
12  
13  
14  
15  
16  
17  
18  
19  
20  
21  
22  
23  
24  
25  
26  
27  
28  
29  
30  
31  
32  
33  
34  
35  
36  
37  
38  
39  
40  
41  
42  
43  
44  
45  
46  
47  
48  
49  
50  
51  
52  
53  
54  
55  
56  
57  
58  
59  
60

443 **Tables**

444

For peer review only

Table 1: Outline of data collection questionnaires, timelines and summary of completions

| Core module themes*           | Brief overview of module content                                                                                                                                    | Data collection period |        |        |        |        |        | Status in Sept-18 |
|-------------------------------|---------------------------------------------------------------------------------------------------------------------------------------------------------------------|------------------------|--------|--------|--------|--------|--------|-------------------|
|                               |                                                                                                                                                                     | Apr-15                 | Apr-16 | Oct-16 | Apr-17 | Oct-17 | Apr-18 |                   |
| Registration                  | - Consent, personal details including date of birth, gender and postcode (for the assignment of Welsh Index of Multiple Deprivation)                                |                        |        |        |        |        |        | 21779             |
| Socio-demographic information | - Ethnic group                                                                                                                                                      |                        |        |        |        |        |        | 14433             |
|                               | - Occupation and social class (National Statistical Socio-economic Classification, NS-SeC)<br>- Family life: relationship status, children, caring responsibilities |                        |        |        |        |        |        | 11004             |
| Behavioural risk factors      | - Physical activity (General Practice Physical Activity questionnaire, GPPAQ)                                                                                       |                        |        |        |        |        |        | 14633             |
|                               | - Smoking (current smoking, second-hand smoke exposure, e-cigarette use)                                                                                            |                        |        |        |        |        |        |                   |
|                               | - Alcohol (frequency in past 12 months, binge drinking in past 7 days)                                                                                              |                        |        |        |        |        |        |                   |
|                               | - Anthropometry (self-report of weight and height)                                                                                                                  |                        |        |        |        |        |        |                   |
| Mental health                 | - Diet (self-report on whether diet is healthy, fruit, veg and sweetened beverage intake yesterday)                                                                 |                        |        |        |        |        |        | 14206             |
|                               | - Mood over the past month, measured using the five-item Mental Health Inventory (MHI-5)                                                                            |                        |        |        |        |        |        | 14581             |
|                               | - Resilience Research Centre Adult Resilience Measure (RRC-ARM 28)                                                                                                  |                        |        |        |        |        |        | 3125              |
|                               | - Buckner Neighbourhood Cohesion Scale                                                                                                                              |                        |        |        |        |        |        | 3206              |
|                               | - Warwick-Edinburgh Mental Wellbeing Scale                                                                                                                          |                        |        |        |        |        |        | Oct 18            |

\* Pregnant women complete modified versions of the core modules

Key to modules:

|  |              |
|--|--------------|
|  | Live modules |
|--|--------------|

**Table 2: Characteristics of the HealthWise Wales cohort and population data from published sources for Wales**

| Characteristic                                                     | HealthWise Wales | Population data for Wales from published sources |
|--------------------------------------------------------------------|------------------|--------------------------------------------------|
| <b>Total who have completed registration form</b>                  | <b>21,779</b>    |                                                  |
| <b>Age group:</b>                                                  |                  |                                                  |
| 16-24 years                                                        | 10%              | 14% <sup>1</sup>                                 |
| 25-44 years                                                        | 30%              | 29%                                              |
| 45-64 years                                                        | 38%              | 32%                                              |
| 65+ years                                                          | 22%              | 25%                                              |
| Completed by (% of those registered)                               | N=21,746 (99%)   |                                                  |
| <b>Sex:</b>                                                        |                  |                                                  |
| Male                                                               | 28%              | 49% <sup>2</sup>                                 |
| Female                                                             | 72%              | 51%                                              |
| Completed by (% of those registered)                               | N=21,737 (99%)   |                                                  |
| <b>Ethnic group:</b>                                               |                  |                                                  |
| White                                                              | 98%              | 98% <sup>3</sup>                                 |
| Other                                                              | 2%               | 2%                                               |
| Completed by (% of those registered)                               | N=14,912 (69%)   |                                                  |
| <b>Standard occupational classification<sup>4</sup>:</b>           |                  |                                                  |
| 1 (Higher managerial, administrative and professional occupations) | 50%              | 27% <sup>5</sup>                                 |
| 2 (Intermediate occupations)                                       | 18%              | 21%                                              |
| 3 (Routine and manual occupations)                                 | 11%              | 37%                                              |
| Other (Never-worked, long-term unemployed and full-time students)  | 21%              | 15%                                              |
| Completed by (% of those completing questionnaire)                 | N=13,268 (97%)   |                                                  |
| <b>Physical activity (GPPAQ):</b>                                  |                  |                                                  |
| Active                                                             | 35%              | No comparable data found                         |
| Moderately active                                                  | 21%              |                                                  |
| Moderately inactive                                                | 15%              |                                                  |
| Inactive                                                           | 29%              |                                                  |
| Completed by (% of those completing questionnaire)                 | N=13,647 (98%)   |                                                  |
| <b>Smoking:</b>                                                    |                  |                                                  |
| Current smoker                                                     | 10%              | 19% <sup>6</sup>                                 |
| Ex-smoker                                                          | 35%              | 29%                                              |
| Never smoked                                                       | 55%              | 52%                                              |
| Completed by (% of those completing questionnaire)                 | N=13,881 (99%)   |                                                  |
| <b>Binge drinking in past week:</b>                                | 23%              | 24% <sup>7</sup>                                 |
| Completed by (% of those completing questionnaire)                 | N=12,229 (88%)   |                                                  |
| <b>Drinking alcohol above guideline levels:</b>                    | 50%              | 40% <sup>7</sup>                                 |
| Completed by (% of those completing questionnaire)                 | N=12,229 (88%)   |                                                  |
| <b>Mental Health Inventory (MHI-5) score:</b>                      |                  |                                                  |
| Score consistent with common mental disorder <sup>8</sup>          | 28%              |                                                  |
| Completed by (% of those completing questionnaire)                 | N=13,694 (99%)   |                                                  |
| <b>Diagnosed with or treated for a mental health condition?</b>    | 32%              | 13% <sup>9</sup>                                 |
| Completed by (% of those completing questionnaire)                 | N=13,837 (99%)   |                                                  |

- 1  
2  
3 <sup>1</sup>Mid-year population estimates for Wales 2017, Office for National Statistics (from StatsWales, <https://statswales.gov.wales/>)  
4 <sup>2</sup>Mid-year population estimates for individuals aged 16+ in Wales 2017, Office for National Statistics (from StatsWales)  
5 <sup>3</sup>Population estimates for individuals aged 16+ in Wales 2011, Office for National Statistics (from StatsWales)  
6 <sup>4</sup>Using the National Statistics Socio-Economic Classification (NS-SEC, Office for National Statistics)  
7 <sup>5</sup>Population estimates for individuals aged 16-74 in Wales, 2011 UK Census  
8 <sup>6</sup>Estimates for individuals 16+yrs from the National Survey for Wales 2017-18 ([https://gov.wales/statistics-and-research/national-survey/?tab=el\\_home&topic=population\\_health&lang=en](https://gov.wales/statistics-and-research/national-survey/?tab=el_home&topic=population_health&lang=en))  
9 <sup>7</sup>Data for individuals aged 16+ from the Welsh Health Survey 2015  
10 <sup>8</sup>Kelly MJ, Dunstan FD, Lloyd K and Fone D. (2008) Evaluating cut-points for the MHI-5 and MCS using the GHQ-12: a comparison of five  
11 different methods. BMC Psychiatry 2008, 8:10  
12 <sup>9</sup>Data for individuals aged 16+ from the Welsh Health Survey 2015; asked whether they were currently being treated for “*depression,*  
13 *anxiety or another mental health illness*”  
14  
15  
16  
17  
18  
19  
20  
21  
22  
23  
24  
25  
26  
27  
28  
29  
30  
31  
32  
33  
34  
35  
36  
37  
38  
39  
40  
41  
42  
43  
44  
45  
46  
47  
48  
49  
50  
51  
52  
53  
54  
55  
56  
57  
58  
59  
60

For peer review only

**Table 3: Engagement of HWW participants with research advertised via the HWW platform**

| Researcher                                                                                                                                                                                                                                                                                           | Study aim                                                                                                                                                                                                                                                                               | Number of responses              |
|------------------------------------------------------------------------------------------------------------------------------------------------------------------------------------------------------------------------------------------------------------------------------------------------------|-----------------------------------------------------------------------------------------------------------------------------------------------------------------------------------------------------------------------------------------------------------------------------------------|----------------------------------|
| <b>Dr Tapio Paljarvi et al</b><br>National Centre for Population Health and Wellbeing Research (NCPHWR)                                                                                                                                                                                              | To validate data on physical activity collected using mobile devices                                                                                                                                                                                                                    | 60                               |
| <b>Professor Ian Jones</b><br>National Centre for Mental Health (NCMH)                                                                                                                                                                                                                               | To recruit participants to the NCMH cohort for mental health research                                                                                                                                                                                                                   | 1,100 (phase 1)<br>600 (phase 2) |
| <b>Dr Anwen Cope<sup>1,2</sup>; Dr Fiona Wood<sup>3</sup>; Dr Nick Francis<sup>3</sup>; Professor Ivor Chestnutt<sup>2</sup></b><br><sup>1</sup> Cardiff and Vale University Health Board; <sup>2</sup> School of Dentistry, Cardiff University; <sup>3</sup> School of Medicine, Cardiff University | To describe the barriers patients experience when trying to access dental care, and to explore factors that influence patients' choice of healthcare provider when experiencing a dental problem                                                                                        | 80                               |
| <b>Dr Dikaos Sakellariou</b><br>School of Healthcare Sciences, Cardiff University                                                                                                                                                                                                                    | To improve care for disabled people                                                                                                                                                                                                                                                     | 8                                |
| <b>Professor Annmarie Nelson</b><br>Marie Curie Palliative Care Research Centre                                                                                                                                                                                                                      | A survey to understand attitudes to death and dying in Wales                                                                                                                                                                                                                            | 2004                             |
| <b>Victoria Shepherd</b><br>NIHR Doctoral Fellow, Cardiff University                                                                                                                                                                                                                                 | To understand decision making involving adults lacking capacity                                                                                                                                                                                                                         | 2                                |
| <b>Professor Petroc Sumner</b><br>School of Psychology, Cardiff University                                                                                                                                                                                                                           | To examine the prevalence of dizziness and vertigo in the general population and the potential relationship with other conditions (e.g. migraine)                                                                                                                                       | 2400                             |
| <b>Dr Patricia Masterson Algar</b><br>School of Health Sciences, Bangor University                                                                                                                                                                                                                   | To examine the experience of young adults who live in families affected by stroke, multiple sclerosis or dementia and investigate their support networks and their engagement in peer support                                                                                           | 2                                |
| <b>Dr Kathryn Peall</b><br>Division of Psychological Medicine and Clinical Neurosciences, Cardiff University                                                                                                                                                                                         | To establish an international registry for Myoclonus Dystonia (a rare childhood-onset hyperkinetic movement disorder that can potentially impact function, daily living, and cause significant pain and psychological problems), to characterise the condition and facilitate research. | 141                              |

Table 4: Examples of researcher-led questionnaire modules on the HealthWise Wales platform

| Module name                             | Researcher                                                                       | Main aim of research                                                                                   | Module availability |        |        |        | Status in Sept-18 |
|-----------------------------------------|----------------------------------------------------------------------------------|--------------------------------------------------------------------------------------------------------|---------------------|--------|--------|--------|-------------------|
|                                         |                                                                                  |                                                                                                        | Oct-16              | Apr-17 | Oct-17 | Apr-18 |                   |
| <b>Theme: Improving health services</b> |                                                                                  |                                                                                                        |                     |        |        |        |                   |
| Care for coughs and colds               | Francis et al<br>School of Medicine, Cardiff University                          | To examine patterns of and beliefs relating to consulting behaviours for respiratory tract infections  |                     |        |        |        | 8886              |
| Medicines and their cost                | Yemm et al<br>School of Pharmacy and Pharmaceutical Sciences, Cardiff University | To examine the acceptability of putting the costs of medicines on dispensing labels                    |                     |        |        |        | 6279              |
| Re-use of medicines                     | McRae et al<br>Cwm Taf University Health Board                                   | To investigate public views on the potential for re-dispensing medicines returned unused to pharmacies |                     |        |        |        | 5476              |
| Oral health in children                 | Kemp et al<br>School of Medicine, Cardiff University                             | To examine oral health behaviours and impact of dental disease on children and families                |                     |        |        |        | 5037              |
| <b>Theme: Cancer research</b>           |                                                                                  |                                                                                                        |                     |        |        |        |                   |
| Sun exposure and sun bed use            | Abbott R<br>Cardiff and Vale University Health Board                             | To assess awareness of skin cancer, preventative behaviours and knowledge of vitamin D                 |                     |        |        |        | 6115              |
| Bowel symptoms and cancer awareness     | Dolwani et al<br>School of Medicine, Cardiff University                          | To investigate factors affecting screening, prevention and early diagnosis of bowel cancer             |                     |        |        |        | 5617              |

## Key to modules:

|  |                    |
|--|--------------------|
|  | Live modules       |
|  | Module expiry date |

1  
2  
3 **Figure legends**  
4  
5  
6

7 **Figure 1: Website and Consent**  
8  
9

10 Footnote:

11 Source of images: Stock Images, produced by Cowshed ([www.wearecowshed](http://www.wearecowshed)) on behalf of HealthWise Wales  
12 ([www.healthwisewales.gov.wales](http://www.healthwisewales.gov.wales)) and used with permission  
13  
14  
15

16  
17 **Figure 2: HealthWise Wales Data Flow**  
18  
19

20 **Figure 3: Proportion of participants resident in each quintile of the Welsh Index of**  
21 **Multiple Deprivation, compared with the general Welsh population**  
22  
23  
24  
25

26 **Figure 4: Flow diagram showing the application process for all HWW activities**  
27  
28  
29  
30  
31  
32  
33  
34  
35  
36  
37  
38  
39  
40  
41  
42  
43  
44  
45  
46  
47  
48  
49  
50  
51  
52  
53  
54  
55  
56  
57  
58  
59  
60

1  
2  
3  
4  
5  
6  
7  
8  
9  
10  
11  
12  
13  
14  
15  
16  
17  
18  
19  
20  
21  
22  
23  
24  
25  
26  
27  
28  
29  
30  
31  
32  
33  
34  
35  
36  
37  
38  
39  
40

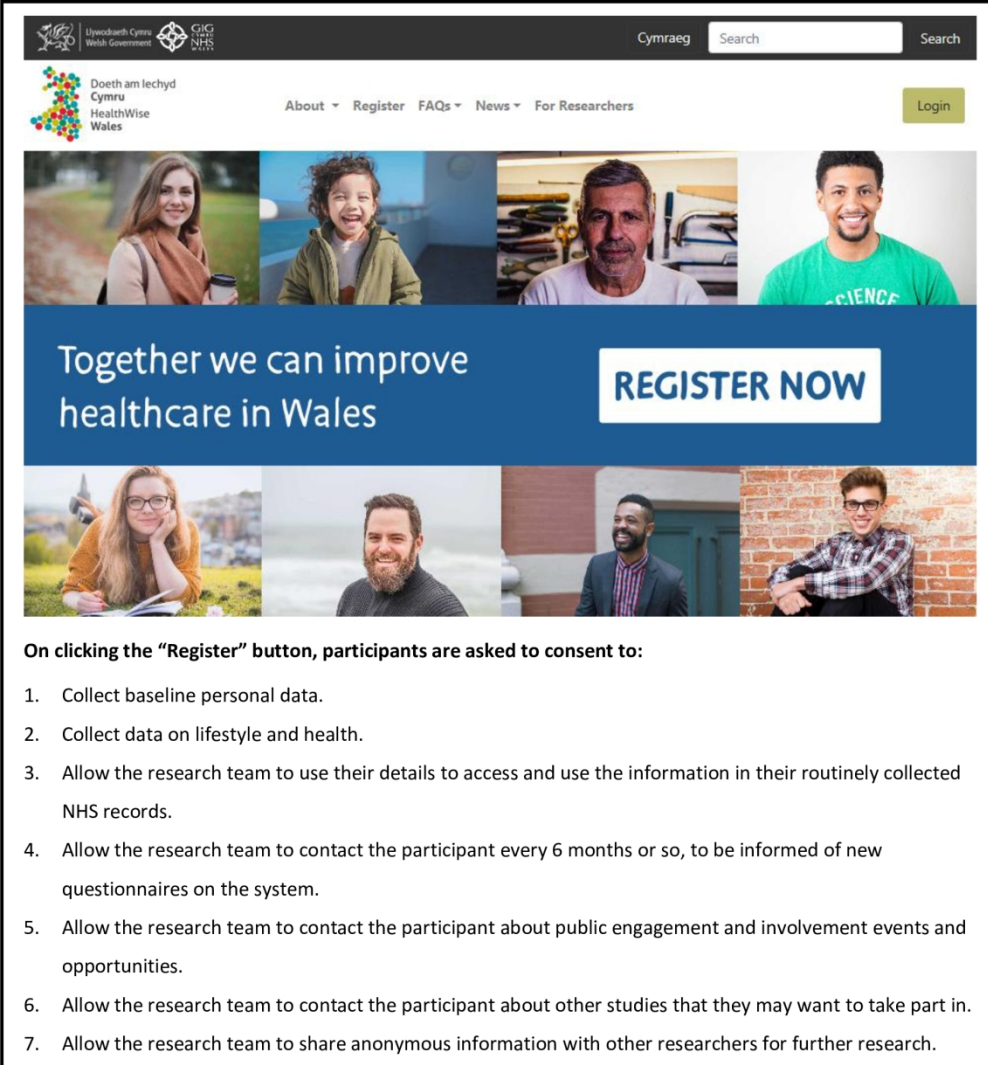

The screenshot shows the HealthWise Wales website. At the top, there are logos for 'Llywodraeth Cymru Welsh Government' and 'GIG Cymru NHS Wales'. The navigation menu includes 'About', 'Register', 'FAQs', 'News', and 'For Researchers'. A search bar is present with the text 'Cymraeg' and 'Search'. The main banner features a blue background with the text 'Together we can improve healthcare in Wales' and a prominent 'REGISTER NOW' button. Below the banner, there are four small images of diverse people. Underneath the images, the text reads: 'On clicking the "Register" button, participants are asked to consent to:' followed by a numbered list of seven consent terms.

**On clicking the "Register" button, participants are asked to consent to:**

1. Collect baseline personal data.
2. Collect data on lifestyle and health.
3. Allow the research team to use their details to access and use the information in their routinely collected NHS records.
4. Allow the research team to contact the participant every 6 months or so, to be informed of new questionnaires on the system.
5. Allow the research team to contact the participant about public engagement and involvement events and opportunities.
6. Allow the research team to contact the participant about other studies that they may want to take part in.
7. Allow the research team to share anonymous information with other researchers for further research.

41 Figure 1: Website and Consent

42 Footnote:

43 Source of images: Stock Images, produced by Cowshed ([www.wearecowshed.com](http://www.wearecowshed.com)) on behalf of HealthWise  
44 Wales ([www.healthwisewales.gov.wales](http://www.healthwisewales.gov.wales)) and used with permission

45  
46  
47 167x179mm (300 x 300 DPI)



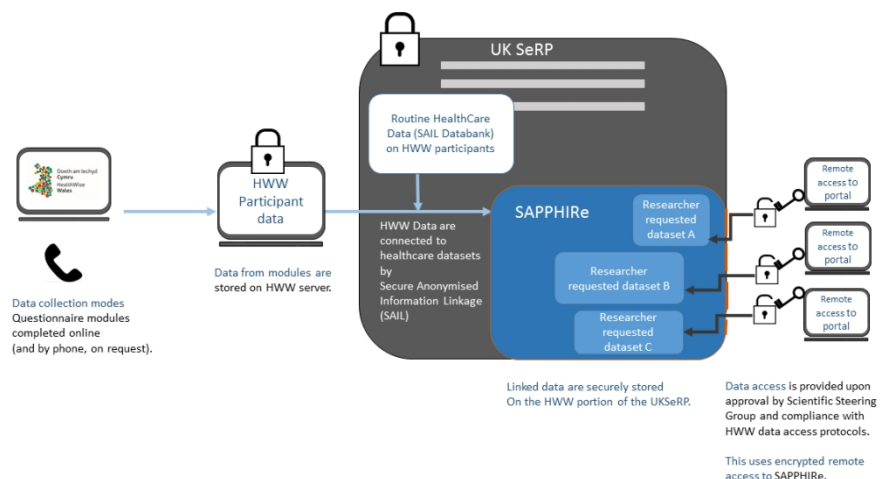

Figure 2: HealthWise Wales Data Flow

108x60mm (300 x 300 DPI)

1  
2  
3  
4  
5  
6  
7  
8  
9  
10  
11  
12  
13  
14  
15  
16  
17  
18  
19  
20  
21  
22  
23  
24  
25  
26  
27  
28  
29  
30  
31  
32  
33  
34  
35  
36  
37  
38  
39  
40  
41  
42  
43  
44  
45  
46  
47  
48  
49  
50  
51  
52  
53  
54  
55  
56  
57  
58  
59  
60

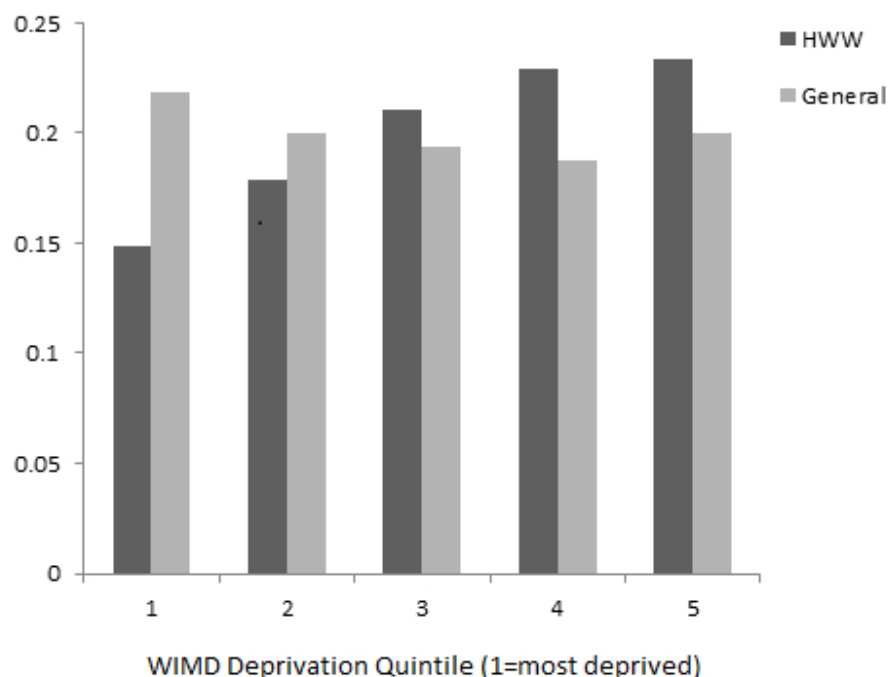

Figure 3: Proportion of participants resident in each quintile of the Welsh Index of Multiple Deprivation, compared with the general Welsh population

43x34mm (300 x 300 DPI)

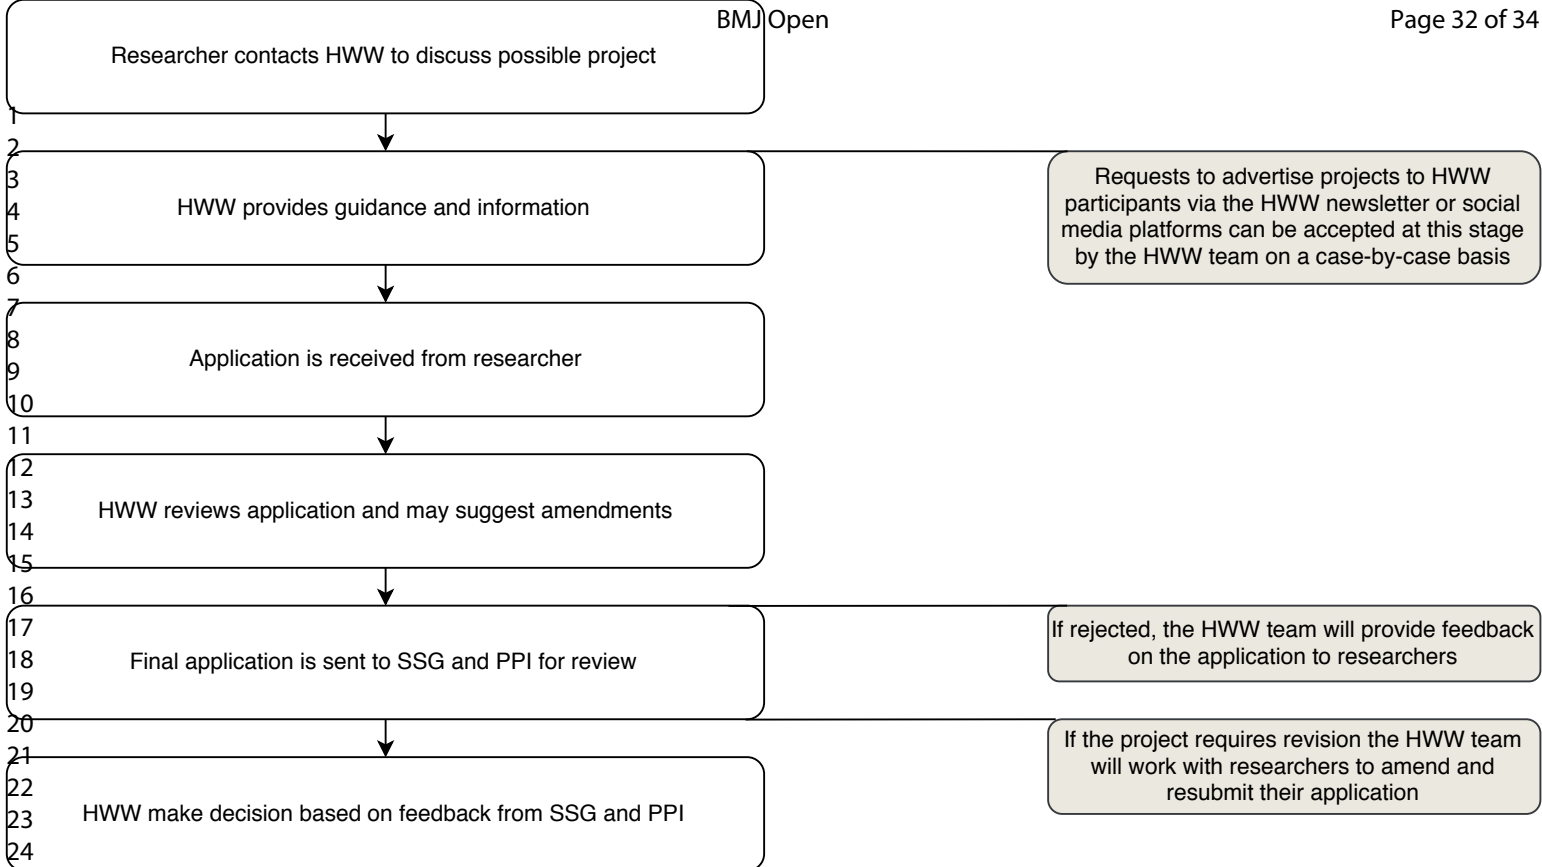

## Timelines

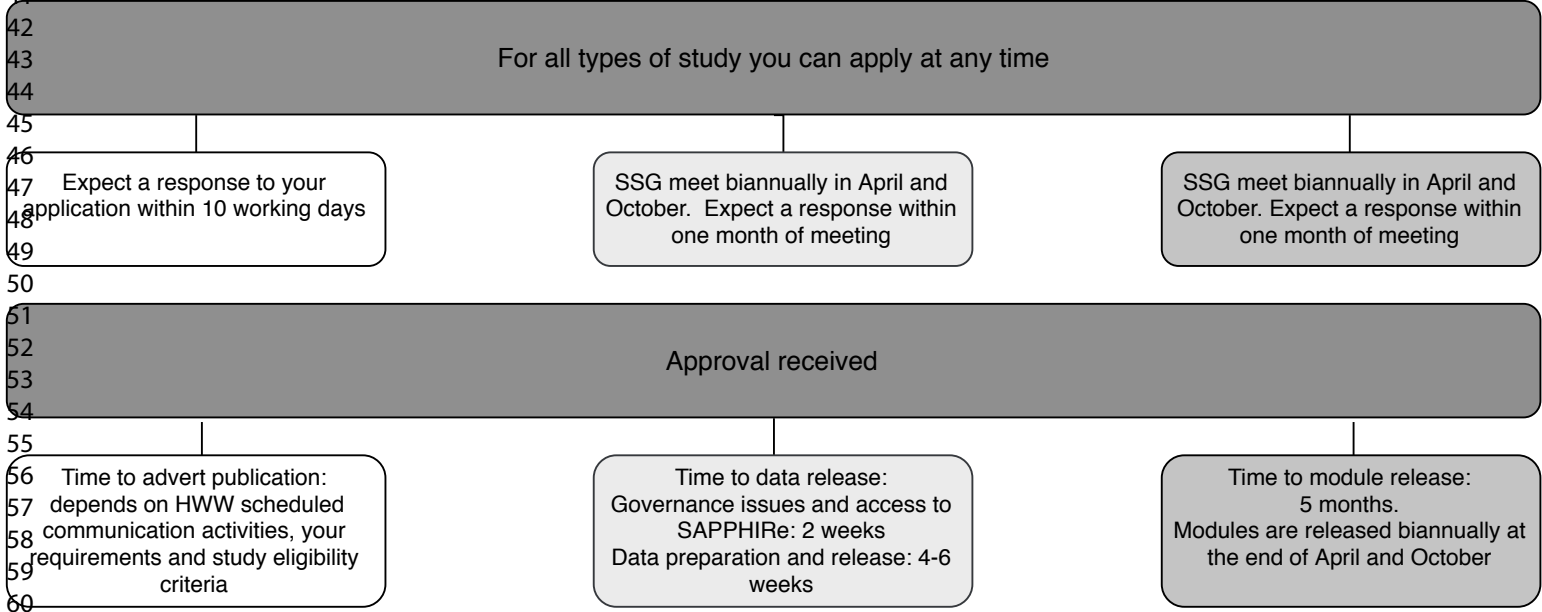

Charges for the use of the HWW platform will be determined on a case by case basis and will be applied to any application approved/actioned after 1 April 2019. Contact the HWW team to discuss.

For peer review only - <http://bmjopen.bmj.com/site/about/guidelines.xhtml>

HWW HealthWise Wales, PPI Patient and Public Involvement, SSG Scientific Steering Group, SAPPHiRe Secure Anonymous Portal and Protected HWW Information Repository

## STROBE Statement—checklist of items that should be included in reports of observational studies

|                              | Item No. | Recommendation                                                                                                                                                                       | Page No.                                                     |
|------------------------------|----------|--------------------------------------------------------------------------------------------------------------------------------------------------------------------------------------|--------------------------------------------------------------|
| <b>Title and abstract</b>    | 1        | (a) Indicate the study's design with a commonly used term in the title or the abstract                                                                                               | 1                                                            |
|                              |          | (b) Provide in the abstract an informative and balanced summary of what was done and what was found                                                                                  | 2-3                                                          |
| <b>Introduction</b>          |          |                                                                                                                                                                                      |                                                              |
| Background/rationale         | 2        | Explain the scientific background and rationale for the investigation being reported                                                                                                 | 5                                                            |
| Objectives                   | 3        | State specific objectives, including any prespecified hypotheses                                                                                                                     | Tables 3 & 4                                                 |
| <b>Methods</b>               |          |                                                                                                                                                                                      |                                                              |
| Study design                 | 4        | Present key elements of study design early in the paper                                                                                                                              | 6-11                                                         |
| Setting                      | 5        | Describe the setting, locations, and relevant dates, including periods of recruitment, exposure, follow-up, and data collection                                                      | 6-8<br>9-10                                                  |
| Participants                 | 6        | (a) <i>Cohort study</i> —Give the eligibility criteria, and the sources and methods of selection of participants. Describe methods of follow-up                                      | 7<br>9                                                       |
|                              |          | (b) <i>Cohort study</i> —For matched studies, give matching criteria and number of exposed and unexposed                                                                             | Not applicable                                               |
| Variables                    | 7        | Clearly define all outcomes, exposures, predictors, potential confounders, and effect modifiers. Give diagnostic criteria, if applicable                                             | 9-10<br>Tables 1 & 4                                         |
| Data sources/<br>measurement | 8*       | For each variable of interest, give sources of data and details of methods of assessment (measurement). Describe comparability of assessment methods if there is more than one group | Table 1                                                      |
| Bias                         | 9        | Describe any efforts to address potential sources of bias                                                                                                                            | 14-15                                                        |
| Study size                   | 10       | Explain how the study size was arrived at                                                                                                                                            | 8                                                            |
| Quantitative variables       | 11       | Explain how quantitative variables were handled in the analyses. If applicable, describe which groupings were chosen and why                                                         | Not applicable (cohort profile paper, no analyses presented) |
| Statistical methods          | 12       | (a) Describe all statistical methods, including those used to control for confounding                                                                                                | Not applicable (cohort profile paper, no analyses presented) |
|                              |          | (b) Describe any methods used to examine subgroups and interactions                                                                                                                  |                                                              |
|                              |          | (c) Explain how missing data were addressed                                                                                                                                          |                                                              |
|                              |          | (d) <i>Cohort study</i> —If applicable, explain how loss to follow-up was addressed                                                                                                  |                                                              |
|                              |          | (e) Describe any sensitivity analyses                                                                                                                                                |                                                              |

|                          |     |                                                                                                                                                                                                                                                                                                                                                                                                               |                                                                                  |
|--------------------------|-----|---------------------------------------------------------------------------------------------------------------------------------------------------------------------------------------------------------------------------------------------------------------------------------------------------------------------------------------------------------------------------------------------------------------|----------------------------------------------------------------------------------|
| Participants             | 13* | (a) Report numbers of individuals at each stage of study—eg numbers potentially eligible, examined for eligibility, confirmed eligible, included in the study, completing follow-up, and analysed<br>(b) Give reasons for non-participation at each stage<br>(c) Consider use of a flow diagram                                                                                                               | Not applicable (cohort profile paper, no analyses presented)                     |
| Descriptive data         | 14* | (a) Give characteristics of study participants (eg demographic, clinical, social) and information on exposures and potential confounders<br>(b) Indicate number of participants with missing data for each variable of interest<br>(c) <i>Cohort study</i> —Summarise follow-up time (eg, average and total amount)                                                                                           | 10-11<br>Table 2<br>Not applicable (cohort profile paper, no analyses presented) |
| Outcome data             | 15* | <i>Cohort study</i> —Report numbers of outcome events or summary measures over time                                                                                                                                                                                                                                                                                                                           | Not applicable (cohort profile paper, no analyses presented)                     |
| Main results             | 16  | (a) Give unadjusted estimates and, if applicable, confounder-adjusted estimates and their precision (eg, 95% confidence interval). Make clear which confounders were adjusted for and why they were included<br>(b) Report category boundaries when continuous variables were categorized<br>(c) If relevant, consider translating estimates of relative risk into absolute risk for a meaningful time period | Not applicable (cohort profile paper, no analyses presented)                     |
| Other analyses           | 17  | Report other analyses done—eg analyses of subgroups and interactions, and sensitivity analyses                                                                                                                                                                                                                                                                                                                | Not applicable (cohort profile paper, no analyses presented)                     |
| Key results              | 18  | Summarise key results with reference to study objectives                                                                                                                                                                                                                                                                                                                                                      | Not applicable (cohort profile paper, no analyses presented)                     |
| Limitations              | 19  | Discuss limitations of the study, taking into account sources of potential bias or imprecision. Discuss both direction and magnitude of any potential bias                                                                                                                                                                                                                                                    | 14-15                                                                            |
| Interpretation           | 20  | Give a cautious overall interpretation of results considering objectives, limitations, multiplicity of analyses, results from similar studies, and other relevant evidence                                                                                                                                                                                                                                    | Not applicable (cohort profile paper, no analyses presented)                     |
| Generalisability         | 21  | Discuss the generalisability (external validity) of the study results                                                                                                                                                                                                                                                                                                                                         | 14-15                                                                            |
| <b>Other information</b> |     |                                                                                                                                                                                                                                                                                                                                                                                                               |                                                                                  |
| Funding                  | 22  | Give the source of funding and the role of the funders for the present study and, if applicable, for the original study on which the present article is based                                                                                                                                                                                                                                                 | 13                                                                               |
